# 1 REPRODUCIBLE AND CLINICALLY TRANSLATABLE DEEP 2 NEURAL NETWORKS FOR CERVICAL SCREENING

3  
4 Syed Rakin Ahmed<sup>1,2,3,4,†</sup>, Brian Befano<sup>5,6,†</sup>, Andreeanne Lemay<sup>1,7</sup>, Didem Egemen<sup>8</sup>, Ana  
5 Cecilia Rodriguez<sup>8</sup>, Sandeep Angara<sup>9</sup>, Kanan Desai<sup>8</sup>, Jose Jeronimo<sup>8</sup>, Sameer Antani<sup>9</sup>,  
6 Nicole Campos<sup>10</sup>, Federica Inturrisi<sup>8</sup>, Rebecca Perkins<sup>11</sup>, Aimee Kreimer<sup>8</sup>, Nicolas  
7 Wentzensen<sup>8</sup>, Rolando Herrero<sup>12</sup>, Marta del Pino<sup>13</sup>, Wim Quint<sup>14</sup>, Silvia de Sanjose<sup>8,15</sup>,  
8 Mark Schiffman<sup>8</sup>, Jayashree Kalpathy-Cramer<sup>1</sup>

## 9 10 **Authors' Affiliations:**

11 <sup>1</sup>Athinoula A. Martinos Center for Biomedical Imaging, Department of Radiology,  
12 Massachusetts General Hospital, Boston, MA 02129, USA

13 <sup>2</sup>Harvard Graduate Program in Biophysics, Harvard Medical School, Harvard University,  
14 Cambridge, MA 02115, USA

15 <sup>3</sup>Massachusetts Institute of Technology, Cambridge, MA 02139, USA

16 <sup>4</sup>Geisel School of Medicine at Dartmouth, Dartmouth College, Hanover, NH 02139, USA

17 <sup>5</sup>Information Management Services, Calverton, MD 20705, USA

18 <sup>6</sup>University of Washington, Seattle, WA 98195, USA

19 <sup>7</sup>NeuroPoly, Polytechnique Montreal, Montreal, QC H3T 1N8, Canada

20 <sup>8</sup>Clinical Epidemiology Unit, Clinical Genetics Branch, Division of Cancer Epidemiology  
21 and Genetics, National Cancer Institute, National Institutes of Health, Bethesda, MD  
22 20892

23 <sup>9</sup>Computational Health Research Branch, National Library of Medicine, Lister Hill  
24 Center, Bethesda, MD 20894

25 <sup>10</sup>Department of Health Policy and Management, Harvard T.H. Chan School of Public  
26 Health, Boston MA 02115

27 <sup>11</sup>Dept of Obstetrics & Gynecology, Boston University Chobanian & Avedisian School of  
28 Medicine, Boston, MA 02118

29 <sup>12</sup>Agencia Costarricense de Investigaciones Biomedicas (ACIB), Fundacion INCIENSA,  
30 San Jose, Costa Rica

31 <sup>13</sup>Hospital Clinic, Barcelona, Spain

32 <sup>14</sup>DDL Diagnostic Laboratory, Rijswijk, The Netherlands

33 <sup>15</sup>ISGlobal, Barcelona, Spain

34  
35 † co-first authors: Syed Rakin Ahmed, Brian Befano

36 **Keywords**

37 human papillomavirus; cervical cancer screening; artificial intelligence; deep learning

38

39 **Running Title:** automated visual evaluation for cervical cancer screening

40

41 **Word Count:** 3,597 (main text)

42

43 **ABSTRACT**

44 Cervical cancer is a leading cause of cancer mortality, with approximately 90% of the  
45 250,000 deaths per year occurring in low- and middle-income countries (LMIC).  
46 Secondary prevention with cervical screening involves detecting and treating precursor  
47 lesions; however, scaling screening efforts in LMIC has been hampered by  
48 infrastructure and cost constraints. Recent work has supported the development of an  
49 artificial intelligence (AI) pipeline on digital images of the cervix to achieve an accurate  
50 and reliable diagnosis of treatable precancerous lesions. In particular, WHO guidelines  
51 emphasize visual triage of women testing positive for human papillomavirus (HPV) as  
52 the primary screen, and AI could assist in this triage task. Published AI reports have  
53 exhibited overfitting, lack of portability, and unrealistic, near-perfect performance  
54 estimates. To surmount recognized issues, we implemented a comprehensive deep-  
55 learning model selection and optimization study on a large, collated, multi-institutional  
56 dataset of 9,462 women (17,013 images). We evaluated relative portability,  
57 repeatability, and classification performance. The top performing model, when  
58 combined with HPV type, achieved an area under the Receiver Operating  
59 Characteristics (ROC) curve (AUC) of 0.89 within our study population of interest, and a  
60 limited total extreme misclassification rate of 3.4%, on held-aside test sets. Our work is  
61 among the first efforts at designing a robust, repeatable, accurate and clinically  
62 translatable deep-learning model for cervical screening.

63

64 The flood of artificial intelligence (AI) and deep learning (DL) approaches in recent years  
65 (1,2) has permeated medicine and medical imaging, where it has had a transformative  
66 impact: some AI based algorithms are now able to interpret imaging at the level of  
67 experts (3,4). This can be attributed to three key factors: 1. a pressing and seemingly  
68 consistent clinical need; 2. the advancements in and convergence of computational  
69 resources, innovations, and collaborations; and 3. the generation of larger and more  
70 comprehensive repositories of patient image data for model development (5). The  
71 nature of clinical tasks performed by AI models has shifted from simple detection or  
72 classification to more nuanced versions with direct relevance for risk stratification of  
73 patients and precision medicine (6).

74 The advancements made by AI in image classification tasks over the past  
75 several years have also reached the cervical imaging domain, for instance, as an  
76 assistive technology for cervical screening (7). Globally, cervical cancer is a leading  
77 cause of cancer morbidity and mortality, with approximately 90% of the 250,000 deaths  
78 per year occurring in low- and middle-income countries (LMIC) (8,9). Persistent  
79 infections with high-risk human papillomavirus (HPV) types are the causal risk factor for  
80 subsequent carcinogenesis (10,11). Accordingly, primary prevention via prophylactic  
81 HPV vaccination (12), and secondary prevention via HPV-based screening for precursor  
82 lesions (“precancer”) are the recommended preventive methods (13,14). Crucially,  
83 screening is the key secondary prevention strategy, with the long process of  
84 carcinogenic transformation from HPV infection to invasive cancer providing an  
85 opportunity for detecting the disease at a stage when treatment is preventive or, at  
86 least, curative (13).

87 However, implementation of an effective cervical screening program in LMIC, in  
88 line with WHO’s elimination targets (15), is hindered by barriers to healthcare delivery.  
89 Cytology and other current tests are costly and have substantial infrastructure  
90 requirements due to the need for laboratory infrastructure, transport of samples, multiple  
91 visits for screening and treatment, and (in the case of cytology) highly trained  
92 cytopathologists and colposcopists for management of abnormal results (16). As a less  
93 resource-intensive alternative, some have established screening of the cervix by visual  
94 inspection after application of acetic acid (VIA) to identify precancerous or cancerous

95 abnormalities via community-based programs, followed by treatment of abnormal  
96 lesions using thermal ablation or cryotherapy and/or large loop excision of the  
97 transformation zone (LLETZ) (17,18). The major limitation of VIA, however, is its  
98 inherently subjective and unreliable nature, resulting in high variability in the ability of  
99 clinicians to differentiate precancer from more common minor abnormalities, which  
100 leads to both undertreatment and overtreatment (19,20).

101         Given the severe burden of cervical cancer and the lack of widely disseminated  
102 screening approaches in LMIC, a critical need exists for methods that can more  
103 consistently, inexpensively, and accurately evaluate cervical lesions and subsequently  
104 enable informed local choice of the appropriate treatment protocols.

105         There has been a relative paucity of prior work utilizing AI and DL for cervical  
106 screening based on cervical images. Crucially, the existing work also largely suffers  
107 from overfitting of the model on the training data. This leads to apparent initial promise,  
108 with either poor performance on or absence of held-aside test sets for evaluating true  
109 model performance. When deployed in different settings, these models fail to return  
110 consistent scores and accurately detect precancers (21–24). This poses significant  
111 concerns when considering downstream deployment in various LMIC, where model  
112 predictions directly inform the course of treatment, and where screening opportunities  
113 are limited.

114         In this work, we address the aforementioned concerns through three  
115 contributions, which are generalizable to clinical domains outside of cervical imaging:

116         1. Improved reliability of model predictions

117         We employ a comprehensive, multi-level model design approach with a primary  
118 aim of improving model reliability. Model reliability or repeatability, is defined as  
119 the ability of a model to generate near-identical predictions for the same woman  
120 under identical conditions, ensuring that the model produces precise, reliable  
121 outputs in the clinical setting. Specifically, we consider multiple combinations of  
122 model architectures, loss functions, balancing strategies, and dropout. Our final  
123 model selection for the classifier, termed automated visual evaluation (AVE), is  
124 based on a criterion that first prioritizes model reliability, followed by class  
125 discrimination or classification performance, and finally reduction of grave errors.

126 2. Improved clinical translatability: multi-level ground truth

127 The large majority of current medical image classification and radiogenomic  
128 pipelines that utilize AI and DL, across clinical domains, use binary ground truths.  
129 Our clinical intuition from working with binary models as well as prior empirical  
130 work have informed us that these models frequently fail to capture the inherent  
131 uncertainty with ambiguous samples (21–24). These uncertain samples are of  
132 two intersecting kinds: samples that are uncertain to the clinician (“rater  
133 uncertainty”) and samples that are uncertain to the model i.e., where the model  
134 reports low confidence scores (“model uncertainty”); both instances can lead to  
135 incorrect classification and subsequent misinformed downstream actions for  
136 these patients. Crucially, real-world clinical oncology samples, across domains  
137 such as cervical, prostate and breast, and across hospitals/institutions, include  
138 many uncertain cases (25–27). To address both levels of ambiguity, we employ  
139 several multi-level, ordinal ground truth delineation schemes in our model  
140 selection.

141 3. Improved downstream clinical-decision making: combination of HPV risk  
142 stratification with model predictions

143 A number of different cancers have identified “sufficient” causes. Examples  
144 across this spectrum range from the presence of BRAF V600E mutation for the  
145 papillary subtype for craniopharyngioma (28), to the presence of BRCA1 or  
146 BRCA2 mutations for breast cancer (29–31). Cervical cancer is unique among  
147 common neoplasms in that HPV is virtually necessary and is present in >95% of  
148 cases. Different HPV types predict higher or lower absolute risk, e.g., HPV 16 is  
149 the highest risk type, followed by HPV 18, while other types pose weaker or no  
150 risk (32–34). In our work, we combined HPV typing and its strong risk  
151 stratification with our visual model predictions, to create a risk score that can be  
152 adapted to local clinical preferences for “risk-action” thresholds. This is  
153 generalizable across clinical domains where additional clinical variables and risk  
154 associations significantly determine patient outcomes.

155  
156

## 157 **RESULTS**

158 In this work, we conducted a comprehensive, multi-stage model selection and  
159 optimization approach (Fig. 1, Fig. 2), utilizing a large, collated multi-institution, multi-  
160 device, and multi-population dataset of 9,462 women (17,013 images) (Table 1), in  
161 order to generate a diagnostic classifier optimized for 1. repeatability; 2. classification  
162 performance; and 3. HPV-group combined risk stratification (Fig. 2) (see METHODS).

### 163 **REPEATABILITY ANALYSIS**

164 Table 2 highlights the summary of the repeatability analysis (Stage I), reporting the  
165 mean, median and adjusted linear regression  $\beta$  values for QWK. We evaluated the  
166 metrics overall and within each design choice category, dropping the worst performing  
167 design choices both overall and within each category. Overall, this resulted in 19.0% of  
168 our design choices being dropped from further consideration (Table 2, shaded in  
169 salmon; Fig. 3a, muted bars). Within each design choice category, this amounted to  
170 dropping the design choices that had adjusted linear regression  $\beta$  values  $>0.06$  below  
171 reference. Specifically, the design choices that were dropped in Stage 1 include the  
172 resnest50 architecture, focal and CORAL loss functions, and models trained without  
173 dropout. Here, we adopted a conservative approach, choosing to keep design choices  
174 that resulted in median QWK and corresponding adjusted  $\beta$  values that are relatively  
175 close and not clearly distinguishable from each other and only dropped the clearly worst  
176 performing choices; for instance, we decided to keep both the “3 level subsets” ( $\beta = -$   
177  $0.026$ ) and the “5 level all patients” ( $\beta = -0.025$ ) design choices within the “Multilevel  
178 Ground Truth” design category, and pass them through to Stage 3.

### 179 **CLASSIFICATION PERFORMANCE ANALYSIS**

180 Table 3 highlights the summary of the classification performance analysis (Stage II),  
181 reporting the median and the interquartile ranges for each of our two key classification  
182 metrics: 1. Youden’s index and 2. extreme misclassifications, as well as the adjusted  
183 linear regression  $\beta$  for each design choice. Similar to Stage 1, we evaluated the metrics  
184 both overall and within each design choice category, dropping the worst performing  
185 design choices at this stage in a two-level approach.

186 In the first level, we looked at the Youden’s index across all design choices and  
187 dropped the worst performing choices; this resulted in 3 choices (SWT architecture, no

188 balancing, 5-level ground truth) or 17.6% of the remaining choices being dropped and  
189 amounted to dropping choices that had median Youden's index of <150 (Table 3,  
190 shaded in salmon; Fig. 3b, muted bars); this was further supported by other design  
191 choices within each design choice category having positive adjusted linear regression  $\beta$   
192 values. In the second level, we considered two factors: 1. median extreme  
193 misclassification percentages (% precancer+ as normal and % normal as precancer+);  
194 and 2. practical reasons, dropping design choices due to a combination of these two  
195 factors. This resulted in three balancing strategies (Sampling 1:1:2, 1:1:4 and 2:1:1) and  
196 the "3 level subsets" ground truth mapping, or 28.6% of the remaining design choices  
197 being dropped (Table 3, shaded in gray). Weighted sampling by using preassigned label  
198 weights per class for the loading sampler (such as 1:1:4) is imprecise since weights are  
199 not adjusted relative to the dataset-specific class imbalance; this skews the model in  
200 making predictions along the lines of the assigned weights. This can be seen among the  
201 sampling strategies dropped: sampling 1:1:4 had a high rate of median % normal  
202 predicted as precancer+ (27.4%), while sampling 2:1:1 had a high rate of median %  
203 precancer+ predicted as normal (24.3%). The "3 level subsets" ground truth mapping  
204 was dropped for practical reasons: it was generated from the 5-level map by omitting  
205 the GL and GH labels to attempt to generate further distinction or discontinuity between  
206 the three classes (normal, GM, precancer+) during model experimentation. Both the "5-  
207 level all patients" and the "3-level subsets" ground-truth mapping are impractical due to  
208 the limited clinical data (either HPV, histology and/or cytology) we anticipate having  
209 available in the field to generate 5 distinct levels of ground truth, thereby rendering  
210 retraining, validation and implementation of these approaches challenging.

### 211 HPV-GROUP COMBINED RISK STRATIFICATION ANALYSIS

212 Fig. 4 and Table 4 highlight the 10 best performing models that emerge following  
213 Stages 1, 2 and 3 of our model selection approach. All 10 models perform similarly  
214 among HPV positive women in the full 5-study set, while showing notable differences  
215 per study as shown in the NHS subset of the full 5-study set, measured by the  
216 combined HPV-AVE AUC. The NHS subset represents women who are closer to a  
217 screening population that we would expect in the field when considering deployment of  
218 our model, since this is a population-based cohort study (35); hence AUC on the NHS



219 subset represents a truer metric for model comparison. The models in Fig. 4a and Table  
220 4 are in decreasing order of AUC on the HPV positive NHS subset. Fig. 4b plots the  
221 ROC curves for each of the top 4 out of the 10 models highlighted in Table 4 and Fig.  
222 4a, highlighting 1. HPV risk-based stratification; 2. model stratification; and 3. combined  
223 stratification incorporating both HPV risk and model predicted class.

#### 224 CLASSIFICATION AND REPEATABILITY ANALYSIS: TEST SET 2

225 Fig. 5a and Table 5 highlight the additional classification (1. % precancer+ as normal  
226 and 2. % normal as precancer+), and repeatability (1. % 2-class disagreement and 2.  
227 QWK) metrics from the predictions of each of the top 10 models on Test Set 2, while  
228 Figure 6 takes a deeper look by comparing individual model predictions across 60  
229 images for these top 10 models on Test Set 2. The top 10 models that pass through all  
230 stages of our model selection approach utilize the following configurations:

- 231 • Architecture: densenet121 or resnet50
- 232 • Loss function: quadratic weighted kappa (QWK) or cross-entropy (CE)
- 233 • Balancing strategy: remove controls or balanced sampling
- 234 • Dropout: Monte-Carlo (MC) dropout (spatial)
- 235 • Multi-level ground truth: 3 level all patients (Normal, Gray Zone, Precancer+)
- 236 • Model type: multiclass classification

237 Based on the individual performances of the models in terms of degree of extreme  
238 misclassifications and repeatability (Table 5, Fig. 5a) and additional risk stratification  
239 (Table 4, Fig. 4), our best performing model (# 36) has the smallest rate of overall  
240 extreme misclassifications (5.9% precancer+ as normal, 4.2% normal as precancer+),  
241 one of the highest repeatability performance (repeatability QWK = 0.8557, 0.69% 2-  
242 class disagreement on repeat images across women), and the highest additional risk  
243 stratification in the NHS subset of the full 5-study dataset, our screening population  
244 (difference between HPV-AVE combined AUC and HPV AUC= 0.164). Among the top  
245 10 models, model # 36 utilizes the following unique design choices:

- 246 • Architecture: densenet121
- 247 • Loss function: quadratic weighted kappa (QWK)
- 248 • Balancing strategy: remove controls

249 Fig. 5b highlights key performance metrics of the top ranked model (# 36) on Test Set 2,  
250 as captured by the corresponding (i) ROC curves, (ii) confusion matrix, (iii) histogram of  
251 the model predicted *score* and (iv) Bland-Altman plot. The ROC curve in (i)  
252 demonstrates excellent discrimination of the normal (class 0) and precancer+ (class 2)  
253 categories, with corresponding AUROC's of 0.88 (class 0 vs. rest) and 0.82 (class 2 vs.  
254 rest) respectively. This is reinforced by the confusion matrix in (ii), which highlights a  
255 total extreme misclassification (extreme off diagonals) rate of only 3.4%, and by the  
256 histogram in (iii), which illustrates the strong class separation in model predicted *score*;  
257 specifically, (iii) highlights that the model confidently predicts the largest clusters of each  
258 of the three ground truth classes correctly as shown by the peaks around *score* 0.0, 1.0  
259 and 2.0. Finally, the Bland-Altman plot in (iv) highlights the model performance in terms  
260 of repeatability: each point on this plot refers to a single woman, with the y-axis  
261 representing the maximum difference in the *score* across repeat images per woman,  
262 and the x-axis plotting the mean of the corresponding *score* across all repeat images  
263 per woman. Repeatability is evaluated using the 95% limits of agreement (LoA),  
264 highlighted by the blue dotted lines in (iv) on either side of the mean (central blue dotted  
265 line); for model # 36, the 95% LoA is quite narrow, with most points clustered around 0  
266 on the y-axis suggesting that *score* values of the model on repeat images taken on the  
267 same visit for each woman are quite similar; here, the 95% LoA adjusted for the number  
268 of classes and presented as a fraction of the possible value range is 0.240 ( $\pm 0.038$ ).

269 Fig. 6 reinforces the validity of our approach for model selection and optimization  
270 by providing a detailed comparison of model performance at the individual image level,  
271 with the top models performing desirably with respect to the clinical problem we are  
272 aiming to address. Incorporation of a gray zone class, together with MC dropout and  
273 loss functions that penalize misclassifications between the extreme classes ensures  
274 that we deal with ambiguity with cases at the class boundaries. For instance, among  
275 these randomly selected 60 images, the best performing model (# 36) has the lowest  
276 rate of extreme misclassifications (none), while predicting a wide enough gray zone that  
277 adequately encapsulates the clinical ambiguity with uncertain cases: these are cases for  
278 which even clinically trained colposcopists and gynecologic oncologists would find  
279 determination of precancer+ status challenging.

## 280 **DISCUSSION**

281 Despite the advancements made by AI in clinical classification tasks, key concerns  
282 hindering model deployment from bench to clinical practice include model reliability and  
283 clinical translatability. An incorrect, unreliable, or unrepeatable model prediction has the  
284 potential to lead to a cascade of clinical actions that might jeopardize the health and  
285 safety of a patient. Therefore, it is essential that models designed with the goal of  
286 clinical deployment be specifically optimized for improved repeatability and clinical  
287 translation.

288 Our work addresses these concerns of reliability and clinical translatability. We  
289 optimize our model selection approach with improved repeatability as the primary stage  
290 (Stage I) of our selection criterion – ensuring that only design choices that produce  
291 repeatable, reliable predictions across multiple images from the same woman’s visit, are  
292 passed through to the next stage of evaluation for classification performance. Our work  
293 builds on prior work highlighting improvements in repeatability of model predictions  
294 made by certain design choices (36,37). Our work also stands out among the paucity of  
295 current approaches that have utilized AI and DL for cervical screening (21–24); as  
296 aforementioned, these are largely plagued by overfitting and no consideration of  
297 repeatability. The dearth of work investigating repeatability of AI models designed for  
298 clinical translation in the current DL and medical image classification literature has  
299 meant that no rigorous study, to the best of our knowledge, has employed repeatability  
300 as a model selection criterion. We posit that our work could motivate further efforts to  
301 include repeatability as a key criterion for clinical AI model design.

302 Subsequent design choices of our work are optimized to improve clinical  
303 translatability. Prior work (21–24) has shown us that while binary classifiers for cervical  
304 image-based cervical precancer+ detection can achieve competitive performance in a  
305 given internal seed dataset, they translate poorly when tested in different settings;  
306 uncertain cases can be misclassified, and predictions tend to oscillate between the two  
307 classes. This oscillation phenomenon could prevent a precancer+ woman from  
308 accessing further evaluation (i.e., false negative) or direct a normal woman through  
309 unnecessary, potentially invasive tests (i.e., false positive). False negatives are  
310 especially problematic in LMIC where screening is limited and represent a missed

311 opportunity to detect and treat precancer via excisional, ablative, or surgical methods, in  
312 order to avert cervical cancer (13,38). By incorporating a multi-class approach and a  
313 loss function that heavily penalizes extreme misclassifications, we improve reliability of  
314 the model-predicted normal and precancer+ categories, and further ensure that women  
315 ascribed to the intermediate classes are recommended for additional clinical evaluation.

316 Finally, our choice of incorporating HPV genotyping together with model  
317 predictions and assessing model performance based on the ability to further stratify  
318 precancer+ risk associated with each of the four groups of high-risk HPV types, is very  
319 relevant for cervical screening. Recent work has shown that the presence of clinical  
320 variables as additional inputs to a neural network can both enhance model performance  
321 and lend interpretability to the value of these variables for clinical decision making  
322 (5,39,40). Incorporating relevant clinical data and prognostic variables is an approach  
323 that, we believe, should become standard for cancer classifier design, and in particular  
324 for neoplasms with well-known clinical causative agents.

325 Our prior work has informed us that the HPV positive women in the NHS subset  
326 better represent a typical screening population: specifically, the NHS subset represents  
327 women who tested HPV-positive in any given population with an intermediate HPV  
328 prevalence (35). The other 4 subsets within the full 5-study dataset comprise of women  
329 referred from HPV-based/cytology-based referral clinics: this represents a colposcopy  
330 population, which has a higher disease prevalence. We optimize each stage (I, II and  
331 III) of our model selection approach on the full 5-study dataset to better capture the  
332 variability in cervical appearance on imaging. At the end of this selection, we find that  
333 our top models do not perform meaningfully differently among HPV positive women in  
334 the full 5-study dataset, highlighted by similar HPV-AVE AUC values across the models  
335 in the “HPV positive 5 study” column on Table 4. For the final selection of the top  
336 candidates, given our goal of using AVE as a triage tool for HPV positive women in a  
337 screening setting, we therefore narrow our focus to the combined HPV-AVE AUC in the  
338 NHS HPV positive subset (“HPV positive NHS” column on Table 4; Fig. 4) for each  
339 model on Test Set 1 and confirm performance of the top candidates on Test Set 2  
340 (Table 5, Fig. 5a).

341

342 Despite the multi-institutional, multi-device and multi-population nature of our final,  
343 collated dataset; the use of multiple held-aside test sets; and the exhaustive search  
344 space utilized for our algorithm choices, our work may be limited by sparse external  
345 validation. Forthcoming work will evaluate our model selection choices on several  
346 additional external datasets, assessing out-of-the-box performance as well as various  
347 transfer learning, retraining and generalization approaches. Future work will additionally  
348 optimize our final model choice for use on edge devices, thereby promoting  
349 deployability and translation in LMIC.

350 In this work, we utilized a large, multi-institutional, multi-device and multi-  
351 population dataset of 9,462 women (17,013 images) as a seed and implemented a  
352 comprehensive model selection approach to generate a diagnostic classifier, termed  
353 AVE, able to classify images of the cervix into “normal”, “gray zone” and “precancer+”  
354 categories. Our model selection approach investigates various choices of model  
355 architecture, loss function, balancing strategy, dropout, and ground truth mapping, and  
356 optimizes for 1. improved repeatability; 2. classification performance; and 3. high-risk  
357 HPV-type-group combined risk-stratification. Our best performing model uniquely 1.  
358 alleviates overfitting by incorporating spatial MC dropout to regularize the learning  
359 process; 2. achieves strong repeatability of predicted class across repeat images from  
360 the same woman; 3. addresses rater and model uncertainty with ambiguous cases by  
361 utilizing a three-level ground truth and QWK as the loss function to penalize extreme  
362 (between boundary class) misclassifications; and 4. achieves a strong additional risk-  
363 stratification when combined with the corresponding HPV type group within our  
364 screening population of interest. While our initial goal is to implement AVE primarily to  
365 triage HPV positive women in a screening setting, we expect our approach and selected  
366 model to also provide reliable predictions both for images obtained in the colposcopy  
367 setting, as well as in the absence of HPV results. Our model selection approach is  
368 generalizable to other clinical domains as well: we hope for our work to foster additional,  
369 carefully designed studies that focus on alleviating overfitting and improving reliability of  
370 model predictions, in addition to optimizing for improved classification performance,  
371 when deciding to use an AI approach for a given clinical task.

372

373 **METHODS**

374

375 **OVERVIEW**

376 This study set out to systematically compare the impact of multiple design choices on  
377 the ability of a deep neural network (DNN) to classify cervical images into delineated  
378 cervical cancer risk categories. We combined images of the cervix from five studies  
379 (Supp. Table 1) into a large convenience sample for analysis. We subsequently labelled  
380 the images into three distinct multi-level ground truth labelling approaches: 1. a 5-level  
381 map, which included normal, gray-low (GL), gray-middle (GM), gray-high (GH), and  
382 precancer+ (termed “5 level all patients”); 2. a 3-level map which combined the  
383 intermediate three labels (GL, GM, GH) into one single gray zone (termed “3 level all  
384 patients”); and 3. an additional 3-level map which excluded the GL and GH labels, and  
385 considered only the normal, GM and precancer+ labels (termed “3 level subsets”). The  
386 choice of multi-level ground truth labelling for model selection was motivated by our  
387 previous work and intuition revealing the failure of binary models, as well as our specific  
388 clinical use case. Table 1 highlights the population level and dataset level  
389 characteristics for our final, collated dataset used for training and evaluation,  
390 highlighting the distribution of histology, cytology, HPV types, population-level study,  
391 age, and number of images per patient within each of the five ground truth classes.

392 We subsequently identified four key design decision categories that were  
393 systematically implemented, intersected, and compared. These included: model  
394 architecture, loss function, balancing strategy, and implementation of dropout, as  
395 highlighted in Fig. 1. The choice of balancing strategy for a particular model determined  
396 the ratios of randomly chosen train and validation sets used during training. We  
397 subsequently trained multiple classifiers using combinations of these design choices  
398 and generated predictions on a common test set (“Test Set 1”) which allowed for  
399 comparison and ranking of approaches based on repeatability, classification  
400 performance, and HPV type-group combined risk stratification. Finally, we confirmed the  
401 performance of the top models on a second test set (“Test Set 2”) to mitigate the impact  
402 of chance on the best performing approaches.

403

## 404 DATASET

405

### 406 Included Studies

407 Cervical images used in this analysis were collected from five separate study  
408 populations labelled NHS, ALTS, CVT, Biop and D Biop (Table 1; Fig. 1). Detailed  
409 descriptions for each study can be found in the supplementary methods section. The  
410 final dataset was collated into a large convenience sample comprising of a total of  
411 17,013 images from 9,462 women.

412

### 413 Analysis population

414 The convenience sample was split using random sampling into four sets for use in the  
415 evaluation of algorithm parameters. For the initial splits, women were randomly selected  
416 into either training, validation, or test ("Test Set 1"), at a rate of 60%, 10%, and 20%  
417 respectively. An additional hold-back test set ("Test Set 2") of 10% of the total women  
418 was selected and used to confirm the findings of the best models from Test Set 1. All  
419 subsets maintained the same study and ground truth proportions as the full set (Table 1,  
420 Supp. Table 2). All images associated with the selected visit for each woman were  
421 included in the set for which the woman was selected; 7359 women (77.8%) had  $\geq 2$   
422 images. For a woman identified as precancer or worse (precancer+), the visit at or  
423 directly preceding the diagnosis was selected, for women identified as any of the gray  
424 zone categories (GL, GM, GH), the visit associated with the abnormality was selected,  
425 and for a woman identified as normal, a study visit, if there were more than one, was  
426 randomly selected for inclusion.

427

### 428 Disease endpoint definitions

429 Ground truth classification in all studies was based on a combination of histology,  
430 cytology, and HPV status with emphasis on strictly defining the highest and lowest  
431 categories while pushing marginal results into the middle categories. When referral  
432 colposcopy lacked cytology or HPV testing the results from the preceding referral  
433 screening visit were used. Ground truth classification was generally consistent across  
434 studies; however, the multiple cytology results available in NHS allowed for slightly  
435 different classifications. In all studies, histologically confirmed cancer, cervical  
436 intraepithelial neoplasia (CIN) 3, or adenocarcinoma in situ (AIS) was considered as

437 precancer+ regardless of referral cytology or HPV, while oncogenic HPV-positive-CIN2  
438 was also considered as precancer+. In NHS, women with 2 or more high grade  
439 squamous intraepithelial lesion (HSIL) cytology results that tested positive for HPV 16  
440 were classified as precancer+. In all studies, images identified as atypical squamous  
441 cells of undetermined significance (ASCUS) or negative for intraepithelial lesion or  
442 malignancy (NILM) with negative oncogenic HPV, or as NILM with missing HPV test  
443 were labelled as normal. All other combinations were labelled as equivocal called gray  
444 zone, with finer distinctions made for the five-level ground truth classification, splitting  
445 the gray zone further into GH, GM, and GL based on specific combinations of cytology  
446 and HPV (Supp. Table 1).

447

#### 448 Ethics

449 All study participants signed a written informed consent prior to enrollment and sample  
450 collection. All five studies were reviewed and approved by multiple Institutional Review  
451 Boards including those of the National Cancer Institute (NCI), National Institutes of  
452 Health (NIH) and within the institution/country where the study was conducted.

#### 453 MODEL

454

#### 455 Algorithm Design

456 A compendium of models were trained using a combination of different architectures,  
457 model types, loss functions, and balancing strategies. All models were trained for 75  
458 epochs with a batch size of 8 and a learning rate of  $10^{-5}$ . The model with the highest  
459 summed normal and precancer area under the Receiver Operating Characteristics  
460 (ROC) curve (AUC) on the validation set was selected as the best model during training.  
461 Before training, all images were cropped with bounding boxes generated from a  
462 YOLOv5 (41) model trained for cervix detection, resized to 256x256 pixels, and scaled  
463 to intensity values from 0 to 1. During training, affine transformations were applied to the  
464 image for data augmentation.

465 The following popular classification architectures were selected based on  
466 literature review and preliminary experiments indicating acceptable baseline  
467 performance: ResNet50 (42), ResNest50 (43), DenseNet121 (44), and Swin  
468 Transformer (45).



469 Four different loss functions were evaluated, three for classification models and one for  
470 ordinal models. For the classification models, we trained with standard cross entropy  
471 (CE), focal (FOC, Equation 1) (46), and quadratic weighted kappa (QWK, Equation 2)  
472 (47) loss functions, while all ordinal models leveraged the CORAL loss (Equation 3)  
473 (48). QWK is based on Cohen's Kappa coefficient; unlike unweighted kappa, QWK  
474 considers the degree of disagreement between ground truth labels and model  
475 predictions and penalizes misclassifications quadratically. Relevant equations are  
476 highlighted below:

$$477 \quad FOC(p_t) = -\alpha_t (1 - p_t)^\gamma \log(p_t) \quad (1)$$

$$478 \quad p_t = \begin{cases} p, & \text{for class} = 1 \\ 1 - p, & \text{otherwise} \end{cases}$$

480 Here,  $\alpha_t$  is a weighting factor used to address class imbalance, also present in standard  
481 cross-entropy loss implementations,  $\gamma \geq 0$  is a tunable focusing parameter and  $p_t$  is the  
482 predicted probability of the ground truth class. We used values of  $\alpha_t = 0.25$  and  $\gamma = 2$ ,  
483 as reported and optimized in previous work (46). Preliminary experiments were also  
484 conducted, iterating across  $\alpha_t = 0.25, 1$ , and inverse class frequency as well as iterating  
485 across  $\gamma = 1.5, 2, 3$  and  $4$ , before arriving at the optimal choices of  $\alpha_t = 0.25$  and  $\gamma = 2$ .

$$487 \quad QWK = \frac{\sum_{i,j} \omega_{ij} O_{ij}}{\sum_{i,j} \omega_{ij} E_{ij}} \quad (2)$$

488 Here,  $\omega$  is the weight matrix for quadratic penalization for every pair  $i, j$  ( $\omega_{ij} = \frac{(i-j)^2}{(C-1)^2}$ ),  $C$   
489 is the number of classes,  $O$  is the confusion matrix represented by the matrix  
490 multiplication between the true value and prediction vectors, and  $E$  is the outer product  
491 between the true value and prediction vectors.

$$492 \quad L_{coral} = \log(\sigma(\hat{y}))y + \log(1 - \sigma(\hat{y}))(1 - y) \quad (3)$$

493 Here  $\sigma$  is the sigmoid function,  $\hat{y}$  is the model's output, and  $y$  is the level-encoded  
494 ground truth.

495 Three balancing strategies were evaluated to deal with the dataset's class  
496 imbalance: weighting the loss function, modifying the loading sampler, and rebalancing  
497 the training and validation sets. These strategies were only applied during the training

498 process and were compared against training without balancing. To emphasize the least  
499 frequent labels, one approach was to apply weights to the loss function in proportion to  
500 the inverse of the occurrence of each class label. A second approach was to reweight  
501 the loading sampler to present images associated with each label equally as well as  
502 with specific weights – 2:1:1, 1:1:2, or 1:1:4 (Normal : Gray Zone : Precancer+). The  
503 final balancing strategy, henceforth termed “remove controls”, involved randomly  
504 removing “normal” (class 0) women from the training and validation sets and  
505 reallocating them to Test Set 1, in order to better rebalance the training and validation  
506 set labels; in this approach, a total of 2383 women (4555 images) from the initial train  
507 set, and 410 women (780 images) from the initial validation set were reallocated to the  
508 test set. The final class balance in the train and validation sets for the “remove controls”  
509 balancing strategy amounted to ~40% normal : 40% gray zone (including GL, GM, and  
510 GH) : 20% precancer+ (Supp. Table 3).

511 Finally, we evaluated multiple approaches to dropping layers during training to  
512 alleviate overfitting and regularize the learning process by randomly removing neural  
513 connections from the model (49). Spatial dropout drops entire feature maps during  
514 training: a rate of 0.1 was applied after each dense layer for the DenseNet models, and  
515 after each residual block for the ResNet and ReNest models. The Swin Transformer  
516 models were used as implemented in (45). Monte Carlo (MC) dropout was additionally  
517 implemented, which can be thought of as a Bayesian approximation (50) generated by  
518 enabling dropout during inference and averaging 50 MC samples. MC models in this  
519 work refer to models trained using dropout combined with the inference prediction  
520 derived from the 50 forward passes.

### 521 Statistical analysis

522 Our model selection approach (Fig. 2) consisted of three stages, each utilizing model  
523 predictions from Test Set 1. After selection of the 10 best models following stage III, we  
524 further evaluated their performance in Test Set 2 to confirm results from Test Set 1.

525 In Stage I of our model selection approach, we evaluated models based on their  
526 ability to classify pairs of cervical images reliably and repeatedly, termed the  
527 repeatability analysis. We calculated the QWK values on the discrete class outcomes  
528 for paired images from the same woman and visit for all models, calculating the mean,

529 median, and inter-quartile range of the QWK for each design choice. We subsequently  
530 ran an adjusted multivariate linear regression of the median QWK vs. the various design  
531 choice categories and computed the  $\beta$  values and corresponding p-values for each  
532 design choice, holding the design choice with the highest median QWK within each  
533 design choice category as reference. This allowed us to gauge the relative impacts from  
534 the various design choices within each of the model architecture, loss function,  
535 balancing strategy, dropout, and ground truth categories.

536 In Stage II of our approach, we evaluated classification performance based on  
537 two key metrics: 1. Youden's index, which captures the overall sensitivity and specificity,  
538 and 2. the degree of extreme misclassifications; this is termed the classification  
539 performance analysis. We computed both sets of metrics for each of the design choices  
540 within each design choice category. Our choice to include misclassification of the  
541 extreme classes (i.e., precancer+ classified as normal or extreme false negative, and  
542 normal classified as precancer+ or extreme false positive) as metrics was motivated by  
543 the importance of these metrics for triage tests (51). Similar to the repeatability analysis,  
544 we calculated the mean, median, and interquartile ranges for these metrics, as well as  
545 conducted separate multivariate linear regressions of each of the three median statistics  
546 vs. the various design choices categories; we computed the  $\beta$  values and corresponding  
547 p-values holding the design choice with the lowest median Youden's index within each  
548 design choice category as reference. This allowed for comparison across design  
549 choices overall and within each design choice category.

550 In Stage III of our model selection approach, we selected the best individual  
551 models determined by their ability to further stratify the risk of precancer associated with  
552 each of four groups of oncogenic high-risk HPV-types. HPV screening is known to have  
553 an extremely high negative predictive value (52,53), and our approach was motivated  
554 by the goal of designing an algorithm to triage HPV positive primary screening. The  
555 HPV types were grouped hierarchically in four groupings, in order of decreasing risk  
556 (54): 1. HPV 16; 2. HPV 18 or 45; 3. HPV 31, 33, 35, 52, 58; and 4. HPV 39, 51, 56, 59,  
557 68. In order to assess the ability of a model to further stratify HPV associated risk, we  
558 ran logistic regression models on a binary precancer+ vs. <precancer variable. These  
559 models were adjusted for hierarchical HPV type group and the model predicted class.

560 We subsequently calculated the difference in AUC between the model adjusted for both  
561 predicted class and HPV type group and the model adjusted only for HPV type group  
562 and highlighted the 10 models with the best additional stratification (Table 4, Fig. 4).

563 Finally, we computed additional classification performance metrics (1. %  
564 precancer+ as normal; and 2. % normal as precancer+), and repeatability metrics (1.  
565 the % 2-class disagreement between image pairs; and 2. QWK values, on the discrete  
566 class outcomes for paired images across woman) for each of the top 10 models on Test  
567 Set 2 (Table 5, Fig. 5), in order to further confirm the performance of these models.  
568 Additionally, to aid better visualization of predictions at the individual model level, we  
569 generated Figure 6 which compares model predictions across 60 images for each of the  
570 top 10 models. To generate this comparison, we first summarized each model's output  
571 as a continuous severity *score*. Specifically, we utilized the ordinality of our problem and  
572 defined the continuous severity *score* as a weighted average using softmax probability  
573 of each class as described in Equation 3, where  $k$  is the number of classes and  $p_i$  the  
574 softmax probability of class  $i$ .

$$575 \quad \text{score} = \sum_{i=0}^k p_i \times i$$

576 Put another way, the *score* is equivalent to the expected value of a random variable that  
577 takes values equal to the class labels, and the probabilities are the model's softmax  
578 probability at index  $i$  corresponding to class label  $i$ . For a three-class model, the values  
579 lie in the range 0 to 2. We next computed the average of the *score* for each image  
580 across all 10 models and arranged the images in order of increasing *score* within each  
581 class. From this *score*-ordered list, we randomly selected 20 images per class,  
582 maintaining the distribution of mean scores within each class, and arranged the images  
583 in order of increasing average *score* within each class in the top row of Fig. 6, color  
584 coded by ground truth. We subsequently compared the predicted class across the 10  
585 models for each of these 60 images (bottom 10 rows of Figure 5), maintaining the  
586 images in the same order as the ground truth row and color-coded by model predicted  
587 class. This enabled us to gain a deeper insight and to compare model performance at  
588 the individual image level.

## FIGURES

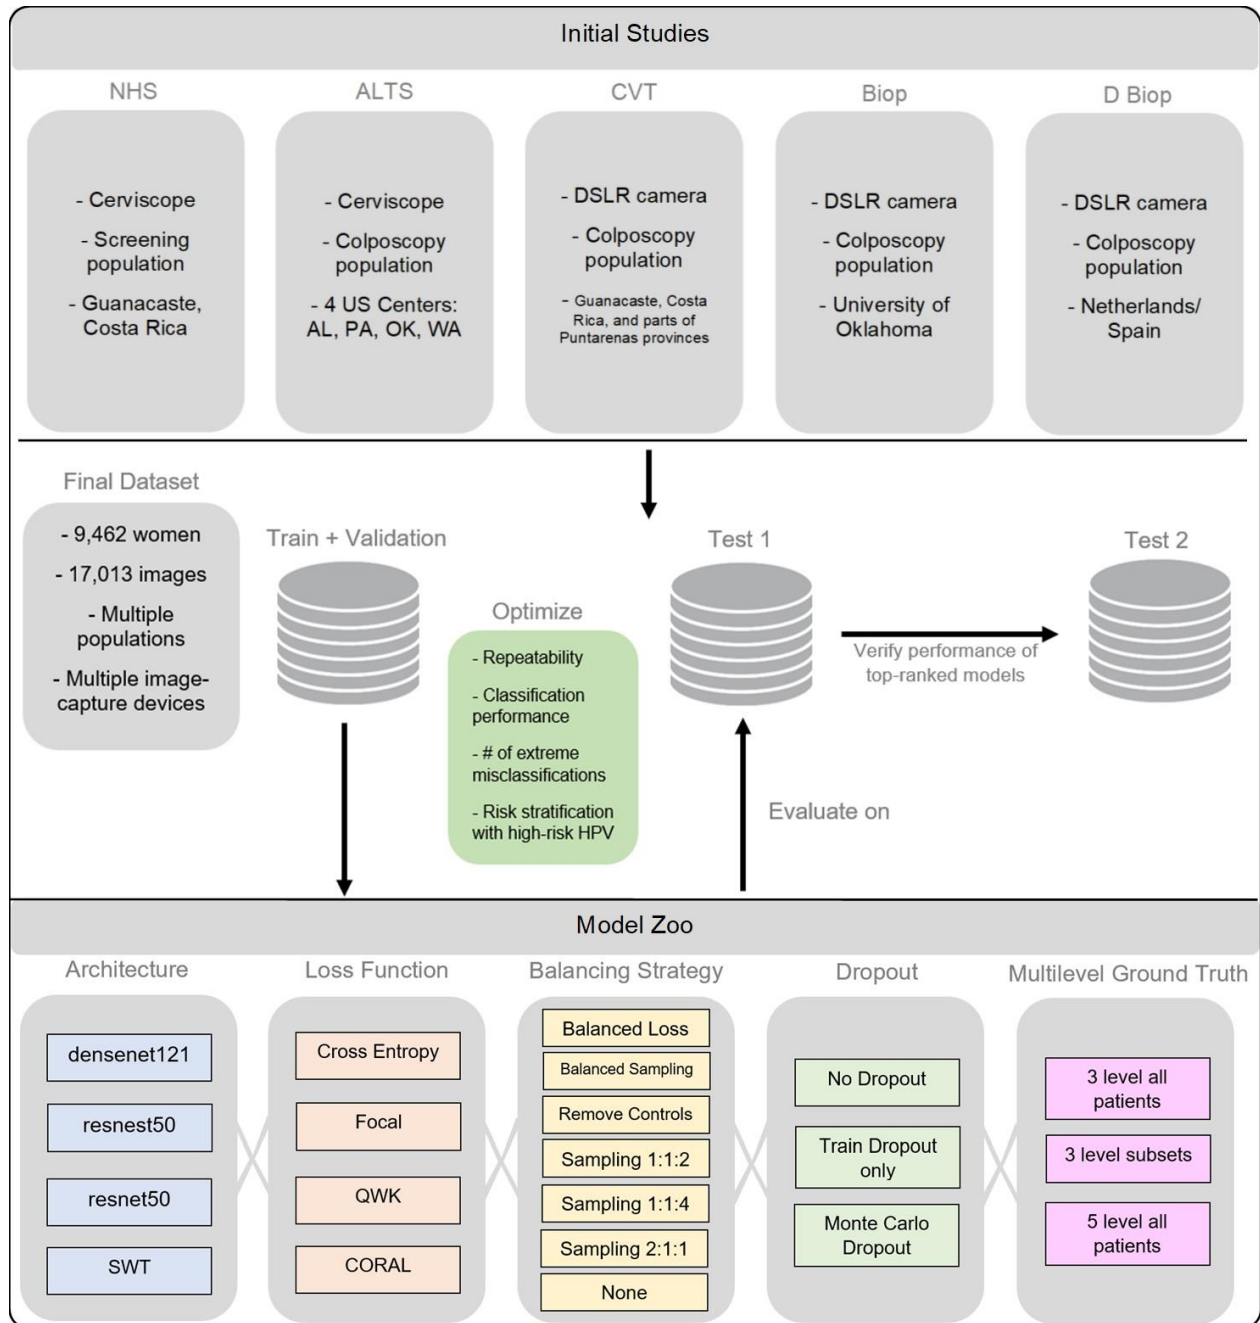

**FIGURE 1:** Model selection and optimization overview. The top panel highlights the five different studies (NHS, ALTS, CVT, Biop and D Biop; see Table 1, Supp. Table 1, and Supp. Methods for detailed description and breakdown of the studies by ground truth) used to generate the final dataset on the middle panel, which is subsequently used to generate a train and validation set, as well as two separate test sets. The intersections of model selection choices on the bottom panel are used to generate a compendium of models trained using the corresponding train and validation sets and evaluated on Test Set 1, optimizing for repeatability, classification performance, reduced extreme misclassifications and combined risk-stratification with high-risk human papillomavirus (HPV) types. Test Set 2 is utilized to verify the performance of top candidates that emerge from evaluation on Test Set 1. SWT: Swin Transformer; QWK: quadratic weighted kappa; CORAL: CORAL (consistent rank logits) loss, as described in the METHODS section.

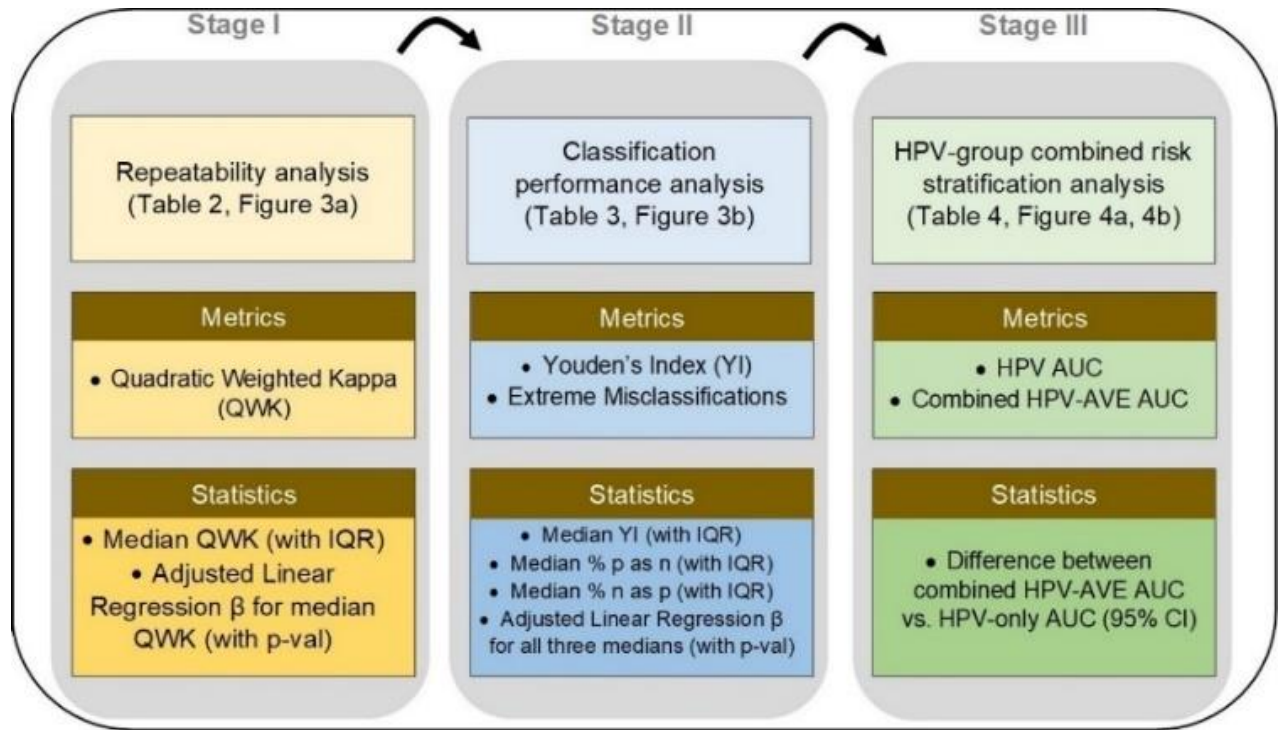

**FIGURE 2:** Model selection approach and statistical analysis utilized in our automated visual evaluation (AVE) classifier. IQR: interquartile range; AUC: area under the receiver operating characteristics (ROC) curve; CI: confidence interval.

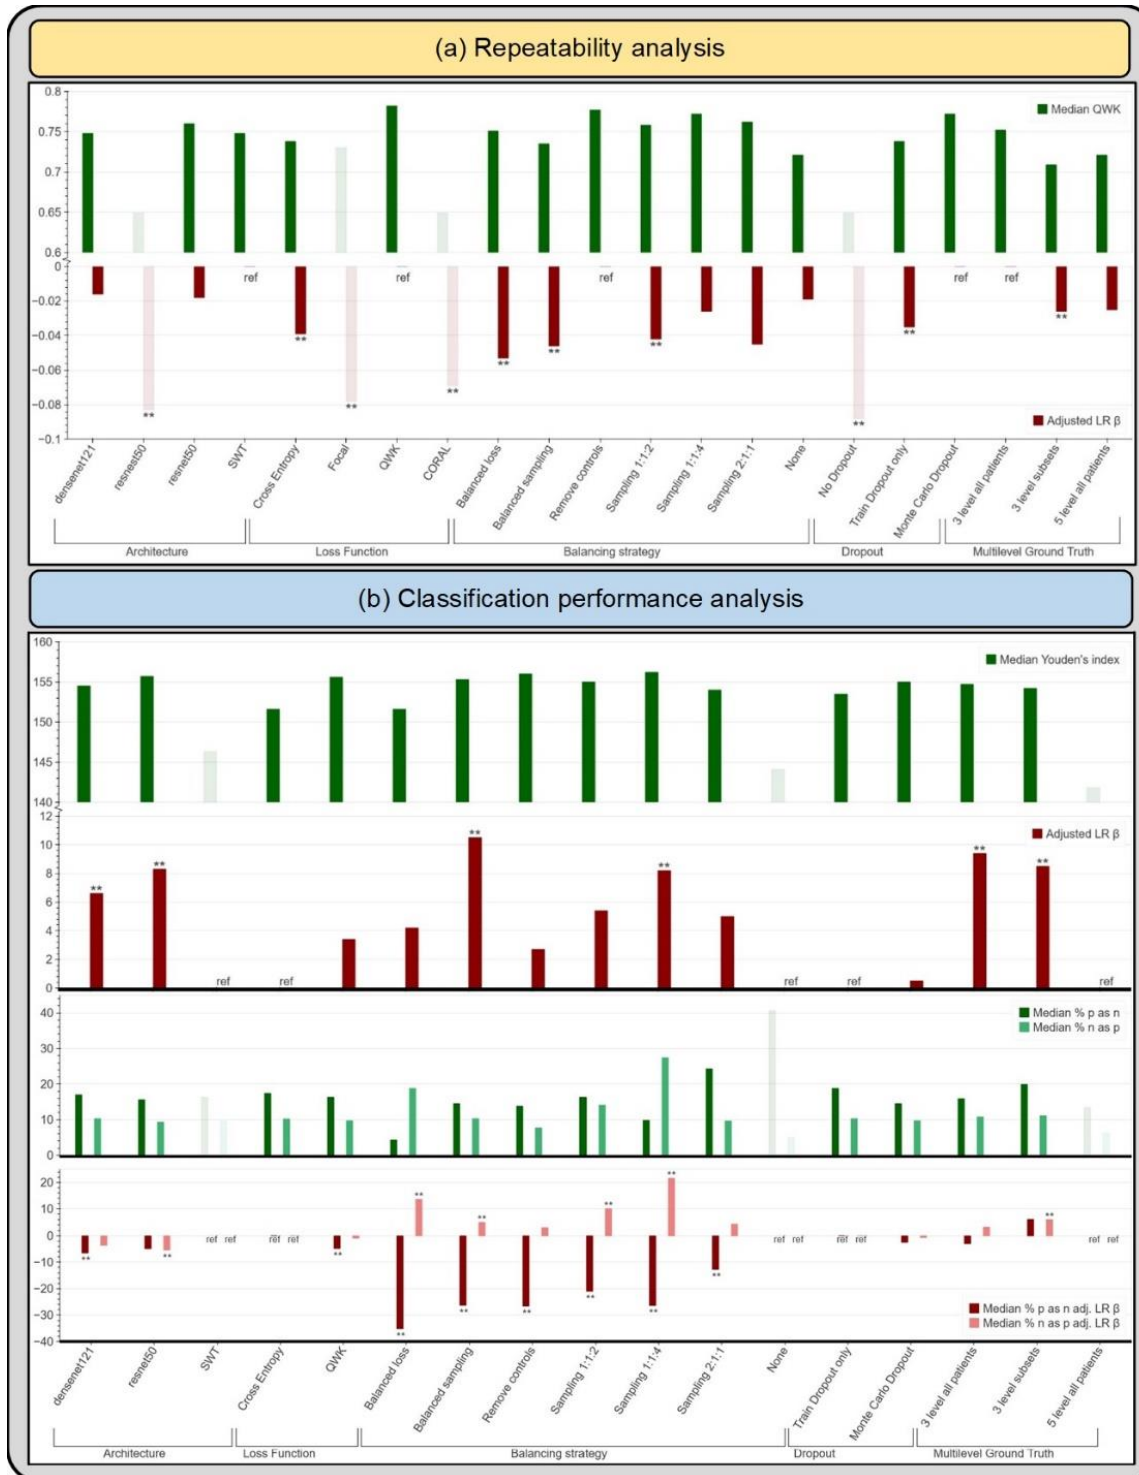

**FIGURE 3:** (a) Median quadratic weighted kappa (QWK) and adjusted linear regression (LR)  $\beta$  across the various design choices, as part of the repeatability analysis. (b) Median Youden's index, median % precancer<sup>+</sup> as normal (% p as n) and median % normal as precancer<sup>+</sup> (% n as p), with the corresponding adjusted LR  $\beta$  values across the various design choices (after filtering for repeatability), as part of the classification performance analysis. SWT: Swin Transformer; CORAL: CORAL (consistent rank logits) loss, as described in the METHODS section; ref: reference category.

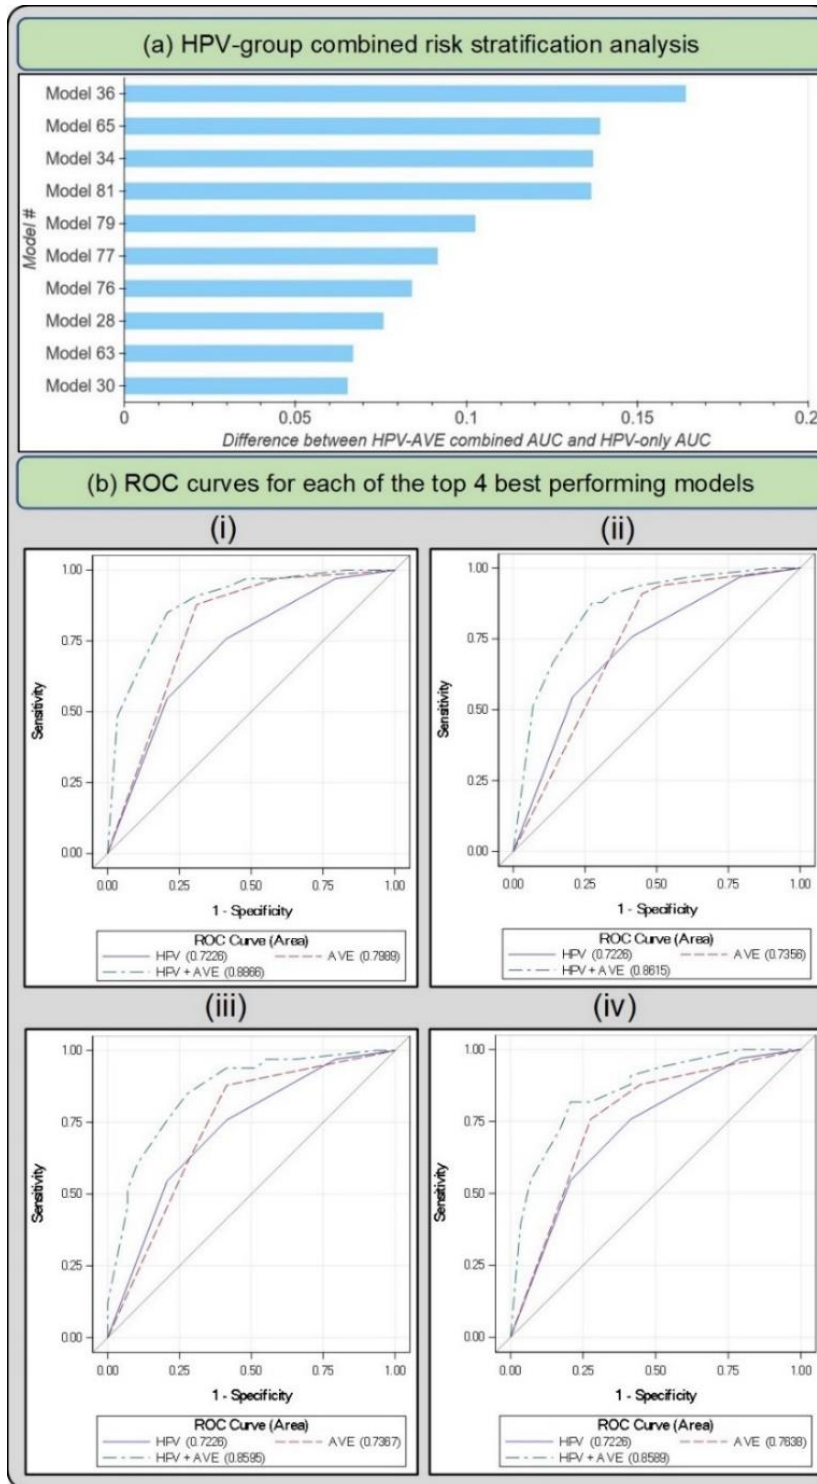

**FIGURE 4:** (a) Difference between HPV+AVE combined AUC and HPV-only AUC in the HPV positive NHS subset for top 10 models (b) Receiver operating characteristics (ROC) curves for each of the top 4 best performing models in the HPV positive NHS subset of the full dataset The plotted lines indicate 1. HPV AUC, 2. AVE AUC and 3. combined HPV-AVE AUC, for models (i) 36, (ii) 65, (iii) 34, and (iv) 81. HPV: human papillomavirus; AVE: automated visual evaluation, which refers to the classifier; AUC: area under the ROC curve.



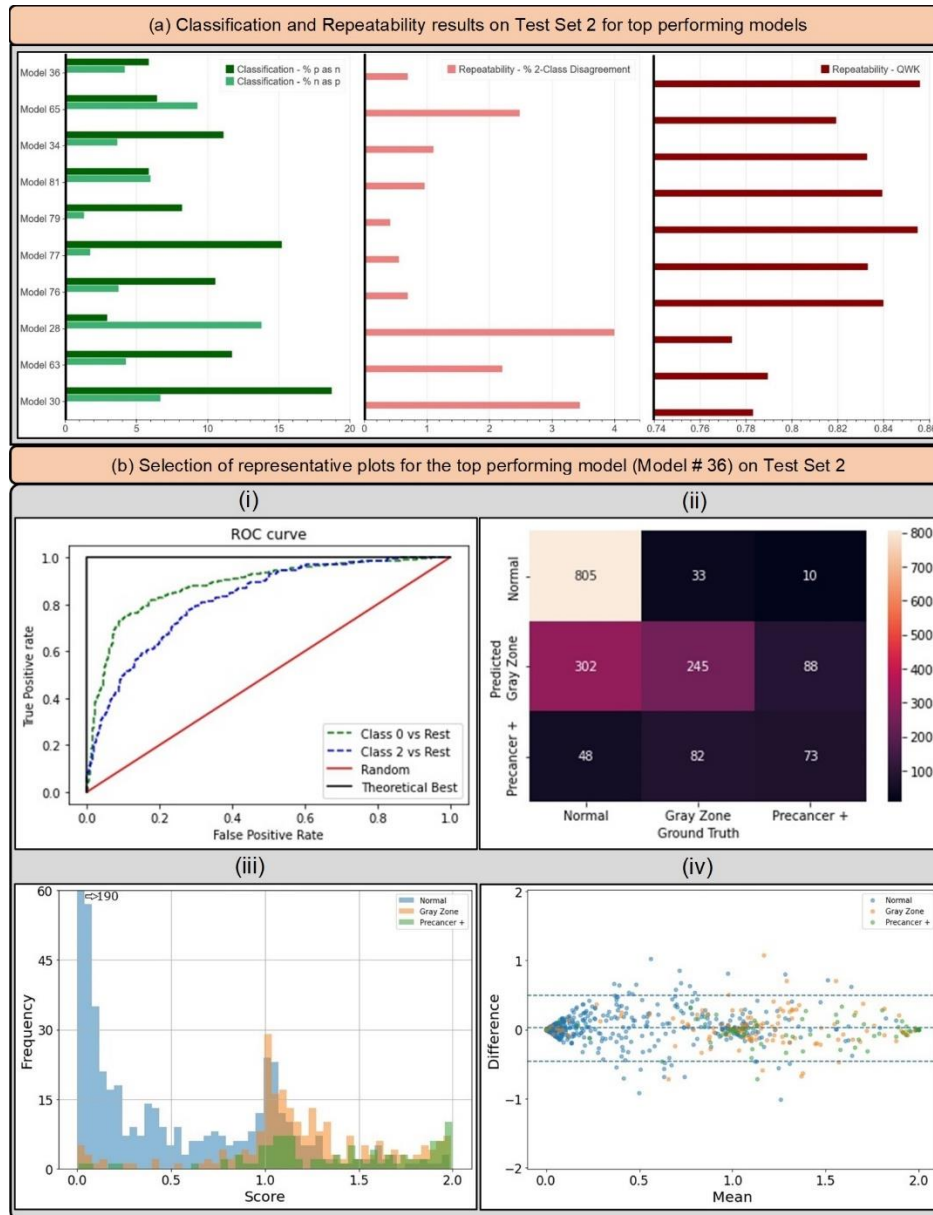

**FIGURE 5:** (a) Classification and repeatability results on Test Set 2 for top 10 best performing models, highlighting the % precancer+ as normal (%p as n) and % normal as precancer+ (%n as p) (left), the % 2-class disagreement between image pairs across women (middle), and the quadratic weighted kappa (QWK) values on the discrete class outcomes for paired images across women (right) for each model. (b) Representative plots for the top performing model (# 36) on Test Set 2 - (i) Receiver operating characteristics (ROC) curves for the normal vs rest (Class 0 vs. rest) and precancer+ vs. rest (Class 2 vs. rest) cases, (ii) confusion matrix, (iii) histogram of model predicted continuous *score*, color coded by ground truth, and (iv) Bland Altman plot of model predictions, color coded by ground truth: each point on this plot refers to a single woman, with the y-axis representing the maximum difference in the score across repeat images per woman, and the x-axis plotting the mean of the corresponding score across all repeat images per woman.

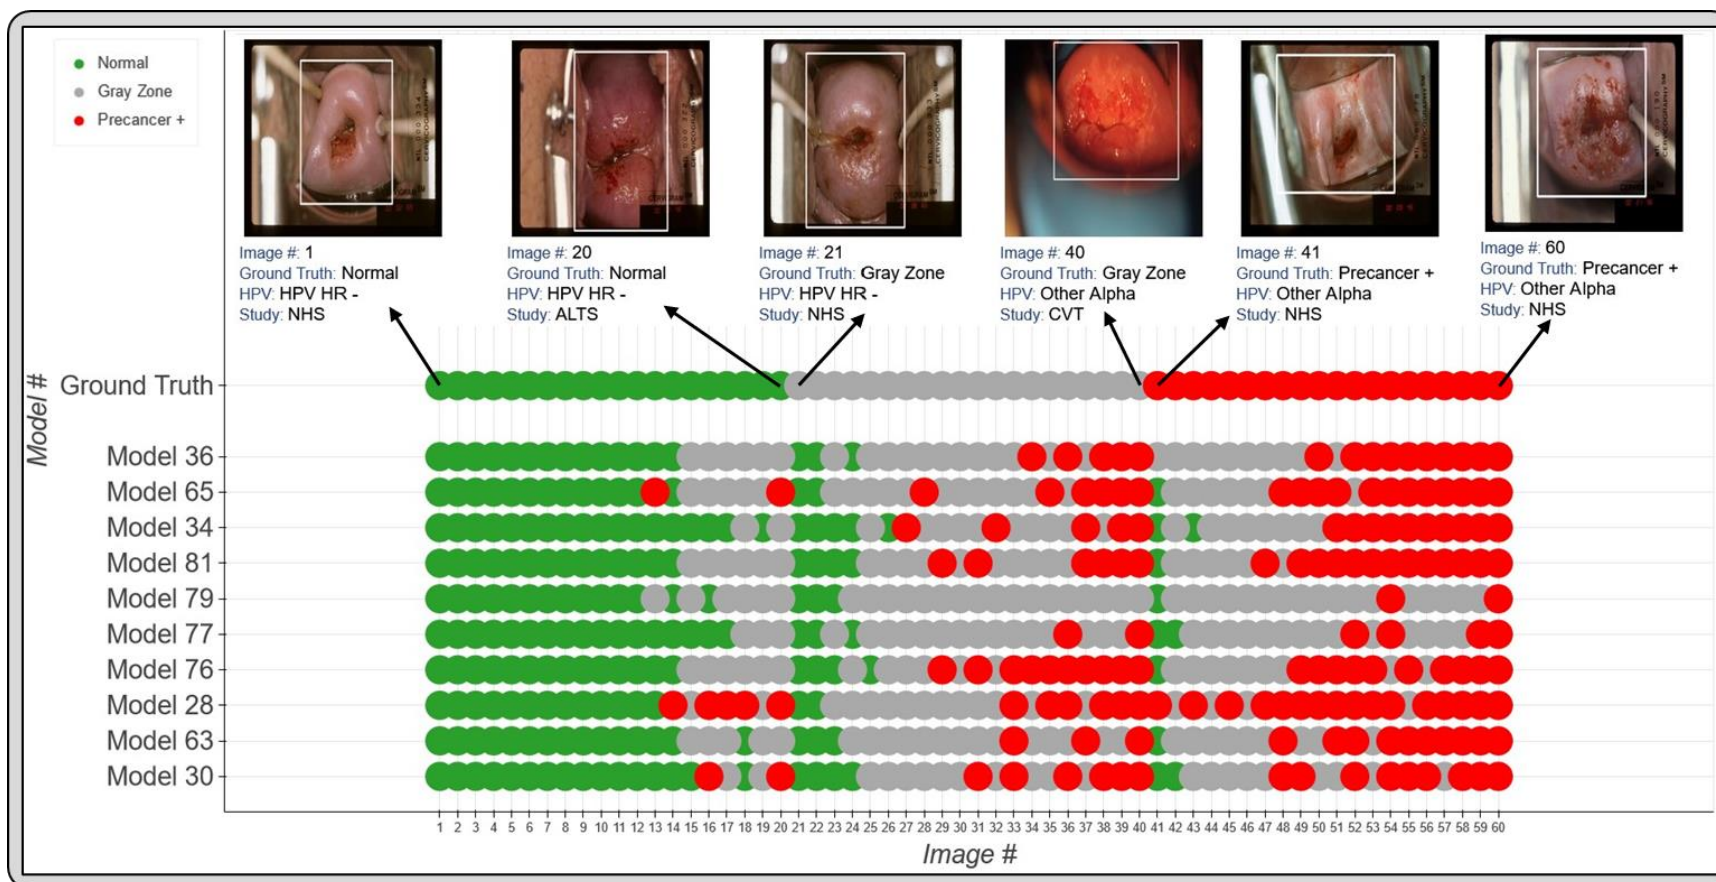

**FIGURE 6:** Model level comparison across top-10 best performing models. 60 images were randomly selected (see METHODS: Statistical Analysis section) and arranged in order of increasing mean score within each ground truth class in the top row (labelled “Ground Truth”). The model predicted class for the top 10 models for each of these 60 images is highlighted in the bottom rows, where the images follow the same order as the top row. The color coding in the top row represents ground truth while in the bottom 10 rows represent the model predicted class. Green: Normal, Gray: Gray Zone, and Red: Precancer +, as highlighted in the legend. Each image corresponds to a different woman.

**EXTENDED DATA: TABLES**

| Table 1: Baseline characteristics of women in each of the ground truth categories |                         |         |                     |         |                        |         |                      |         |                        |         |
|-----------------------------------------------------------------------------------|-------------------------|---------|---------------------|---------|------------------------|---------|----------------------|---------|------------------------|---------|
| Characteristics                                                                   | Ground truth categories |         |                     |         |                        |         |                      |         |                        |         |
|                                                                                   | no. (%)                 |         |                     |         |                        |         |                      |         |                        |         |
|                                                                                   | Normal<br>(N=6092)      |         | Gray Low<br>(N=867) |         | Gray Middle<br>(N=918) |         | Gray High<br>(N=529) |         | Precancer+<br>(N=1056) |         |
| <b>Histology</b>                                                                  |                         |         |                     |         |                        |         |                      |         |                        |         |
| Cancer                                                                            | 0                       | (0.0%)  | 0                   | (0.0%)  | 0                      | (0.0%)  | 0                    | (0.0%)  | 23                     | (2.2%)  |
| CIN3/AIS                                                                          | 0                       | (0.0%)  | 0                   | (0.0%)  | 0                      | (0.0%)  | 0                    | (0.0%)  | 571                    | (54.1%) |
| CIN2                                                                              | 0                       | (0.0%)  | 0                   | (0.0%)  | 1                      | (0.1%)  | 66                   | (12.5%) | 456                    | (43.2%) |
| <CIN2                                                                             | 873                     | (14.3%) | 467                 | (53.9%) | 580                    | (63.2%) | 280                  | (52.9%) | 6                      | (0.6%)  |
| No histology                                                                      | 5219                    | (85.7%) | 400                 | (46.1%) | 337                    | (36.7%) | 183                  | (34.6%) | 0                      | (0.0%)  |
| <b>Cytology</b>                                                                   |                         |         |                     |         |                        |         |                      |         |                        |         |
| ASC-H/HSIL                                                                        | 0                       | (0.0%)  | 164                 | (18.9%) | 110                    | (12.0%) | 481                  | (90.9%) | 647                    | (61.3%) |
| LSIL                                                                              | 0                       | (0.0%)  | 220                 | (25.4%) | 586                    | (63.8%) | 15                   | (2.8%)  | 209                    | (19.8%) |
| ASCUS                                                                             | 4288                    | (70.4%) | 95                  | (11.0%) | 222                    | (24.2%) | 19                   | (3.6%)  | 112                    | (10.6%) |
| Normal                                                                            | 1801                    | (29.6%) | 386                 | (44.5%) | 0                      | (0.0%)  | 11                   | (2.1%)  | 67                     | (6.3%)  |
| Other/missing                                                                     | 3                       | (0.0%)  | 2                   | (0.2%)  | 0                      | (0.0%)  | 3                    | (0.6%)  | 21                     | (2.0%)  |
| <b>HPV type</b>                                                                   |                         |         |                     |         |                        |         |                      |         |                        |         |
| 16                                                                                | 0                       | (0.0%)  | 95                  | (11.0%) | 172                    | (18.7%) | 174                  | (32.9%) | 507                    | (48.0%) |
| 18, 45                                                                            | 0                       | (0.0%)  | 66                  | (7.6%)  | 141                    | (15.4%) | 54                   | (10.2%) | 123                    | (11.6%) |
| 31,33,35,52,58                                                                    | 0                       | (0.0%)  | 187                 | (21.6%) | 346                    | (37.7%) | 174                  | (32.9%) | 312                    | (29.5%) |
| 39,51,56,59,68                                                                    | 0                       | (0.0%)  | 130                 | (15.0%) | 250                    | (27.2%) | 59                   | (11.2%) | 78                     | (7.4%)  |
| Negative                                                                          | 6087                    | (99.9%) | 382                 | (44.1%) | 6                      | (0.7%)  | 68                   | (12.9%) | 26                     | (2.5%)  |
| Missing                                                                           | 5                       | (0.1%)  | 7                   | (0.8%)  | 3                      | (0.3%)  | 0                    | (0.0%)  | 10                     | (0.9%)  |
| <b>Study</b>                                                                      |                         |         |                     |         |                        |         |                      |         |                        |         |
| NHS                                                                               | 4518                    | (74.2%) | 114                 | (13.1%) | 127                    | (13.8%) | 34                   | (6.4%)  | 173                    | (16.4%) |
| ALTS                                                                              | 943                     | (15.5%) | 231                 | (26.6%) | 314                    | (34.2%) | 171                  | (32.3%) | 363                    | (34.4%) |
| CVT                                                                               | 424                     | (7.0%)  | 297                 | (34.3%) | 208                    | (22.7%) | 49                   | (9.3%)  | 195                    | (18.5%) |
| Biop                                                                              | 66                      | (1.1%)  | 51                  | (5.9%)  | 63                     | (6.9%)  | 32                   | (6.0%)  | 132                    | (12.5%) |
| D Biop                                                                            | 141                     | (2.3%)  | 174                 | (20.1%) | 206                    | (22.4%) | 243                  | (45.9%) | 193                    | (18.3%) |
| <b>Age (30-49)</b>                                                                |                         |         |                     |         |                        |         |                      |         |                        |         |
| Mean (SD)                                                                         | 34.5                    | (6.8)   | 30.7                | (5.8)   | 30.1                   | (5.0)   | 30.3                 | (5.4)   | 30.6                   | (5.6)   |
| Median (IQR)                                                                      | 33                      | (29-40) | 29                  | (26-33) | 29                     | (26-32) | 29                   | (26-32) | 29                     | (26-33) |
| <b># images/woman</b>                                                             |                         |         |                     |         |                        |         |                      |         |                        |         |
| Mean (SD)                                                                         | 1.9                     | (0.3)   | 1.4                 | (0.6)   | 1.6                    | (0.6)   | 1.6                  | (0.6)   | 1.7                    | (0.6)   |
| Median (IQR)                                                                      | 2                       | (2-2)   | 1                   | (1-2)   | 2                      | (1-2)   | 2                    | (1-2)   | 2                      | (1-2)   |

**TABLE 1:** Baseline characteristics of women in each of the ground truth categories, highlighting proportions by histology, cytology, human papillomavirus (HPV) type, study, as well as age and # images/woman. The detailed study descriptions and ground truth assignment by study can be found in Supp. Table 1 and in the Supp. Methods section. CIN: cervical intraepithelial neoplasia; AIS: adenocarcinoma in situ; ASC-H: atypical squamous cells, cannot rule out high grade squamous intraepithelial lesion; HSIL: high-grade squamous intraepithelial lesion; LSIL: low-grade squamous intraepithelial lesion; ASCUS: atypical squamous cells of undetermined significance; SD: standard deviation; IQR: interquartile range.

| Table 2: Repeatability analysis |                      |             |         |              |                 |                     |
|---------------------------------|----------------------|-------------|---------|--------------|-----------------|---------------------|
| Design Choice Category          | Design Choices       | QWK summary |         |              |                 |                     |
|                                 |                      | Mean (SD)   |         | Median (IQR) |                 | Adjusted LR $\beta$ |
| Architecture                    | densenet121          | 0.743       | (0.062) | 0.748        | (0.719 - 0.786) | -0.016              |
|                                 | resnest50            | 0.675       | (0.069) | 0.649        | (0.630 - 0.743) | -0.083**            |
|                                 | resnet50             | 0.752       | (0.048) | 0.760        | (0.736 - 0.776) | -0.018              |
|                                 | SWT                  | 0.743       | (0.079) | 0.748        | (0.671 - 0.815) | ref                 |
| Loss Function                   | Cross Entropy        | 0.725       | (0.069) | 0.738        | (0.671 - 0.771) | -0.039**            |
|                                 | Focal                | 0.717       | (0.070) | 0.730        | (0.654 - 0.773) | -0.078**            |
|                                 | QWK                  | 0.779       | (0.042) | 0.782        | (0.752 - 0.809) | ref                 |
|                                 | CORAL                | 0.678       | (0.056) | 0.649        | (0.636 - 0.729) | -0.069**            |
| Balancing strategy              | Balanced loss        | 0.703       | (0.107) | 0.751        | (0.647 - 0.769) | -0.053**            |
|                                 | Balanced sampling    | 0.729       | (0.057) | 0.735        | (0.675 - 0.781) | -0.046**            |
|                                 | Remove controls      | 0.775       | (0.054) | 0.777        | (0.744 - 0.809) | ref                 |
|                                 | Sampling 1:1:2       | 0.744       | (0.055) | 0.758        | (0.728 - 0.783) | -0.042**            |
|                                 | Sampling 1:1:4       | 0.776       | (0.033) | 0.772        | (0.752 - 0.798) | -0.026              |
|                                 | Sampling 2:1:1       | 0.764       | (0.017) | 0.762        | (0.750 - 0.778) | -0.045              |
|                                 | None                 | 0.706       | (0.069) | 0.721        | (0.638 - 0.749) | -0.019              |
| Dropout                         | No Dropout           | 0.663       | (0.072) | 0.649        | (0.620 - 0.723) | -0.088**            |
|                                 | Train Dropout only   | 0.725       | (0.058) | 0.738        | (0.681 - 0.759) | -0.035**            |
|                                 | Monte Carlo Dropout  | 0.760       | (0.059) | 0.772        | (0.733 - 0.802) | ref                 |
| Multilevel Ground Truth         | 3 level all patients | 0.740       | (0.068) | 0.752        | (0.719 - 0.780) | ref                 |
|                                 | 3 level subsets      | 0.707       | (0.070) | 0.709        | (0.637 - 0.778) | -0.026**            |
|                                 | 5 level all patients | 0.705       | (0.064) | 0.721        | (0.650 - 0.748) | -0.025              |

**TABLE 2:** Repeatability analysis highlighting quadratic weighted kappa (QWK) summary statistics – mean, median with interquartile range (IQR) and adjusted linear regression (LR)  $\beta$  values – for design choices within each design choice category for our automated visual evaluation (AVE) classifier. Rows shaded in salmon indicate design choices filtered out at this stage due to poor repeatability. SWT: Swin Transformer; CORAL: CORAL (consistent rank logits) loss, as described in the METHODS section; ref: reference category.

| Table 3: Classification performance analysis |                      |                     |                 |                     |                            |                     |              |                        |               |        |
|----------------------------------------------|----------------------|---------------------|-----------------|---------------------|----------------------------|---------------------|--------------|------------------------|---------------|--------|
| Design Choice Category                       | Design Choices       | Youden's index (YI) |                 |                     | Extreme misclassifications |                     |              |                        |               |        |
|                                              |                      |                     |                 | Adjusted LR $\beta$ | % precancer+ as normal     |                     |              | % normal as precancer+ |               |        |
|                                              |                      | Median (IQR)        |                 |                     | Median (IQR)               | Adjusted LR $\beta$ | Median (IQR) | Adjusted LR $\beta$    |               |        |
| Architecture                                 | densenet121          | 154.5               | (151.5 - 156.3) | 6.6**               | 17.0                       | (10.9 - 23.2)       | -6.5**       | 10.3                   | (6.8 - 13.6)  | -3.6   |
|                                              | resnet50             | 155.7               | (151.7 - 157.9) | 8.3**               | 15.6                       | (11.6 - 23.9)       | -4.9**       | 9.3                    | (5.7 - 12.2)  | -5.4** |
|                                              | SWT                  | 146.3               | (134.7 - 148.0) | ref                 | 16.3                       | (13.0 - 56.5)       | ref          | 9.5                    | (4.7 - 14.6)  | ref    |
| Loss Function                                | Cross Entropy        | 151.6               | (144.1 - 155.7) | ref                 | 17.4                       | (11.2 - 37.3)       | ref          | 10.2                   | (5.3 - 14.5)  | ref    |
|                                              | QWK                  | 155.6               | (153.7 - 157.6) | 3.4                 | 16.3                       | (11.6 - 21.0)       | -4.8**       | 9.7                    | (7.6 - 11.7)  | -0.9   |
| Balancing Strategy                           | Balanced loss        | 151.6               | (142.3 - 154.4) | 4.2                 | 4.3                        | (3.6 - 5.8)         | -35.2**      | 18.8                   | (10.3 - 23.0) | 13.6** |
|                                              | Balanced sampling    | 155.3               | (153.3 - 157.8) | 10.5**              | 14.5                       | (13.0 - 18.1)       | -26.3**      | 10.3                   | (8.7 - 11.9)  | 4.9**  |
|                                              | Remove controls      | 156.0               | (153.5 - 156.9) | 2.7                 | 13.8                       | (10.9 - 18.1)       | -26.6**      | 7.7                    | (4.2 - 10.3)  | 2.9    |
|                                              | Sampling 1:1:2       | 155.0               | (153.6 - 156.0) | 5.4                 | 16.3                       | (12.0 - 21.4)       | -21.0**      | 14.1                   | (11.3 - 17.4) | 10.1** |
|                                              | Sampling 1:1:4       | 156.2               | (151.4 - 158.4) | 8.2**               | 9.8                        | (6.2 - 14.1)        | -26.4**      | 27.4                   | (15.9 - 38.5) | 21.6** |
|                                              | Sampling 2:1:1       | 154.0               | (152.9 - 154.5) | 5.0                 | 24.3                       | (23.2 - 25.0)       | -12.7**      | 9.6                    | (7.4 - 11.4)  | 4.2    |
|                                              | None                 | 144.1               | (135.2 - 148.9) | ref                 | 40.6                       | (37.0 - 55.8)       | ref          | 5.0                    | (2.3 - 6.6)   | ref    |
| Dropout                                      | Train Dropout only   | 153.5               | (148.8 - 155.7) | ref                 | 18.8                       | (12.3 - 25.4)       | ref          | 10.3                   | (6.7 - 14.1)  | ref    |
|                                              | Monte Carlo Dropout  | 155.0               | (146.0 - 157.2) | 0.5                 | 14.5                       | (9.4 - 22.5)        | -2.5         | 9.7                    | (5.1 - 14.2)  | -0.7   |
| Multilevel Ground Truth                      | 3 level all patients | 154.7               | (151.6 - 156.8) | 9.4**               | 15.9                       | (10.5 - 23.6)       | -3.0         | 10.8                   | (6.8 - 15.2)  | 3.1    |
|                                              | 3 level subsets      | 154.2               | (153.0 - 156.7) | 8.5**               | 19.9                       | (18.1 - 23.2)       | 6.0          | 11.1                   | (9.5 - 13.4)  | 5.9**  |
|                                              | 5 level all patients | 141.8               | (135.3 - 151.8) | ref                 | 13.4                       | (10.9 - 50.7)       | ref          | 6.2                    | (4.8 - 9.5)   | ref    |

**TABLE 3:** Classification performance analysis highlighting Youden’s index (YI) and extreme misclassification statistics – median with interquartile range (IQR) and adjusted linear regression (LR)  $\beta$  values – for design choices within each design choice category for our automated visual evaluation (AVE) classifier, after filtering for repeatability (Table 2). Rows shaded in salmon indicate design choices filtered out at this stage due to poor classification performance (as captured by the Youden’s index). Rows shaded in gray indicate design choices subsequently filtered out due to a combination of poor classification performance (as captured by the rate of extreme misclassifications) and/or practical reasons. SWT: Swin Transformer; ref: reference category.

| Table 4: Selection of top individual models with best additional risk stratification |      |              |                    |                                     |             |               |                         |             |               |
|--------------------------------------------------------------------------------------|------|--------------|--------------------|-------------------------------------|-------------|---------------|-------------------------|-------------|---------------|
| Model #                                                                              | Loss | Architecture | Balancing strategy | Additional risk stratification      |             |               |                         |             |               |
|                                                                                      |      |              |                    | HPV positive 5-study (full dataset) |             |               | HPV positive NHS subset |             |               |
|                                                                                      |      |              |                    | HPV+AVE AUC                         | Difference* | 95%CI         | HPV+AVE AUC             | Difference* | 95%CI         |
| 36                                                                                   | QWK  | densenet121  | Remove controls    | 0.683                               | 0.019       | 0.009 - 0.041 | 0.887                   | 0.164       | 0.086 - 0.261 |
| 65                                                                                   | CE   | resnet50     | Balanced loss      | 0.684                               | 0.020       | 0.008 - 0.041 | 0.862                   | 0.139       | 0.064 - 0.233 |
| 34                                                                                   | QWK  | densenet121  | Balanced sampling  | 0.677                               | 0.013       | 0.004 - 0.031 | 0.859                   | 0.137       | 0.063 - 0.234 |
| 81                                                                                   | QWK  | resnet50     | Balanced sampling  | 0.681                               | 0.018       | 0.006 - 0.039 | 0.859                   | 0.136       | 0.061 - 0.239 |
| 79                                                                                   | CE   | resnet50     | Remove controls    | 0.677                               | 0.014       | 0.002 - 0.029 | 0.825                   | 0.102       | 0.031 - 0.189 |
| 77                                                                                   | CE   | densenet121  | Remove controls    | 0.689                               | 0.025       | 0.011 - 0.049 | 0.814                   | 0.091       | 0.033 - 0.191 |
| 76                                                                                   | QWK  | resnet50     | Remove controls    | 0.677                               | 0.013       | 0.003 - 0.029 | 0.807                   | 0.084       | 0.028 - 0.184 |
| 28                                                                                   | CE   | densenet121  | Balanced loss      | 0.709                               | 0.046       | 0.027 - 0.074 | 0.798                   | 0.076       | 0.023 - 0.152 |
| 63                                                                                   | CE   | resnet50     | Balanced sampling  | 0.688                               | 0.024       | 0.012 - 0.049 | 0.789                   | 0.067       | 0.024 - 0.171 |
| 30                                                                                   | CE   | densenet121  | Balanced sampling  | 0.702                               | 0.038       | 0.022 - 0.068 | 0.788                   | 0.065       | 0.018 - 0.160 |

**TABLE 4:** Performance of top individual models following human papillomavirus (HPV) group combined risk stratification (Stage III of model selection) on Test Set 1, within the HPV-positive full-dataset and HPV-positive NHS subset. The models are in decreasing order of area under the receiver operating characteristics (ROC) curve (AUC) on the human papillomavirus (HPV) positive NHS subset of the full dataset. AVE: automated visual evaluation, which refers to the classifier; CI: confidence interval.

\*Difference = Combined HPV+AVE AUC minus HPV-only AUC.

| Table 5: Classification and Repeatability results on Test Set 2 for top performing models |      |              |                    |                     |          |               |       |
|-------------------------------------------------------------------------------------------|------|--------------|--------------------|---------------------|----------|---------------|-------|
| Model #                                                                                   | Loss | Architecture | Balancing Strategy | Classification (EM) |          | Repeatability |       |
|                                                                                           |      |              |                    | % p as n            | % n as p | %2-Cl. D.     | QWK   |
| 36                                                                                        | QWK  | densenet121  | Remove controls    | 5.85%               | 4.16%    | 0.69%         | 0.856 |
| 65                                                                                        | CE   | resnet50     | Balanced loss      | 6.43%               | 9.26%    | 2.48%         | 0.819 |
| 34                                                                                        | QWK  | densenet121  | Balanced sampling  | 11.11%              | 3.64%    | 1.10%         | 0.833 |
| 81                                                                                        | QWK  | resnet50     | Balanced sampling  | 5.85%               | 5.97%    | 0.96%         | 0.839 |
| 79                                                                                        | CE   | resnet50     | Remove controls    | 8.19%               | 1.30%    | 0.41%         | 0.855 |
| 77                                                                                        | CE   | densenet121  | Remove controls    | 15.20%              | 1.73%    | 0.55%         | 0.833 |
| 76                                                                                        | QWK  | resnet50     | Remove controls    | 10.53%              | 3.72%    | 0.69%         | 0.840 |
| 28                                                                                        | CE   | densenet121  | Balanced loss      | 2.92%               | 13.77%   | 3.99%         | 0.774 |
| 63                                                                                        | CE   | resnet50     | Balanced sampling  | 11.70%              | 4.24%    | 2.20%         | 0.789 |
| 30                                                                                        | CE   | densenet121  | Balanced sampling  | 18.71%              | 6.67%    | 3.44%         | 0.783 |

**TABLE 5:** Classification and repeatability results on Test Set 2 for top 10 best performing models, highlighting % precancer+ as normal (% p as n) and % normal as precancer+ (% n as p), the % 2-class disagreement between image pairs across women (% 2-Cl. D.), and the quadratic weighted kappa (QWK) values on the discrete class outcomes for paired images across women, for each model. EM: extreme misclassifications.

## REFERENCES

1. Piccialli F, Somma V Di, Giampaolo F, Cuomo S, Fortino G. A survey on deep learning in medicine: Why, how and when? *Inf Fusion*. 2021 Feb 1;66:111–37.
2. Sperr E. PubMed by Year [Internet]. [cited 2022 Nov 12]. Available from: <https://esperr.github.io/pubmed-by-year/?q1=%22deep learning%22 or %22neural network%22&startyear=1970>
3. Esteva A, Kuprel B, Novoa RA, Ko J, Swetter SM, Blau HM, et al. Dermatologist-level classification of skin cancer with deep neural networks. *Nat* 2017 5427639 [Internet]. 2017 Jan 25 [cited 2022 Nov 12];542(7639):115–8. Available from: <https://www.nature.com/articles/nature21056>
4. Hannun AY, Rajpurkar P, Haghpanahi M, Tison GH, Bourn C, Turakhia MP, et al. Cardiologist-level arrhythmia detection and classification in ambulatory electrocardiograms using a deep neural network. *Nat Med* 2019 251 [Internet]. 2019 Jan 7 [cited 2022 Nov 12];25(1):65–9. Available from: <https://www.nature.com/articles/s41591-018-0268-3>
5. Topol EJ. High-performance medicine: the convergence of human and artificial intelligence. *Nat Med* 2019 251 [Internet]. 2019 Jan 7 [cited 2022 May 5];25(1):44–56. Available from: <https://www.nature.com/articles/s41591-018-0300-7>
6. Esteva A, Chou K, Yeung S, Naik N, Madani A, Mottaghi A, et al. Deep learning-enabled medical computer vision. *npj Digit Med* 2021 41 [Internet]. 2021 Jan 8 [cited 2022 Nov 12];4(1):1–9. Available from: <https://www.nature.com/articles/s41746-020-00376-2>
7. Wentzensen N, Lahrmann B, Clarke MA, Kinney W, Tokugawa D, Poitras N, et al. Accuracy and Efficiency of Deep-Learning–Based Automation of Dual Stain Cytology in Cervical Cancer Screening. *JNCI J Natl Cancer Inst* [Internet]. 2021 Jan 4 [cited 2022 Dec 10];113(1):72–9. Available from: <https://academic.oup.com/jnci/article/113/1/72/5862008>
8. de Martel C, Plummer M, Vignat J, Franceschi S. Worldwide burden of cancer attributable to HPV by site, country and HPV type. *Int J Cancer* [Internet]. 2017 Aug 15 [cited 2022 Nov 12];141(4):664–70. Available from: <https://onlinelibrary.wiley.com/doi/full/10.1002/ijc.30716>
9. Sung H, Ferlay J, Siegel RL, Laversanne M, Soerjomataram I, Jemal A, et al. Global Cancer Statistics 2020: GLOBOCAN Estimates of Incidence and Mortality Worldwide for 36 Cancers in 185 Countries. *CA Cancer J Clin*. 2021 May;71(3):209–49.
10. Schiffman M, Doorbar J, Wentzensen N, De Sanjosé S, Fakhry C, Monk BJ, et al. Carcinogenic human papillomavirus infection. *Nat Rev Dis Prim* 2016 21 [Internet]. 2016 Dec 1 [cited 2022 Nov 12];2(1):1–20. Available from: <https://www.nature.com/articles/nrdp201686>
11. Schiffman MH, Bauer HM, Hoover RN, Glass AG, Cadell DM, Rush BB, et al. Epidemiologic Evidence Showing That Human Papillomavirus Infection Causes Most Cervical Intraepithelial Neoplasia. *JNCI J Natl Cancer Inst* [Internet]. 1993 Jun 16 [cited 2022 Nov 13];85(12):958–64. Available from: <https://academic.oup.com/jnci/article/85/12/958/1085600>
12. Lei J, Ploner A, Elfström KM, Wang J, Roth A, Fang F, et al. HPV Vaccination and the Risk of Invasive Cervical Cancer. *N Engl J Med* [Internet]. 2020 Oct 1 [cited 2022 Nov 12];383(14):1340–8. Available from:



- <https://www.nejm.org/doi/full/10.1056/NEJMoa1917338>
13. Lowy DR, Solomon D, Hildesheim A, Schiller JT, Schiffman M. Human papillomavirus infection and the primary and secondary prevention of cervical cancer. *Cancer* [Internet]. 2008 Oct 1 [cited 2022 Nov 12];113(S7):1980–93. Available from: <https://onlinelibrary.wiley.com/doi/full/10.1002/cncr.23704>
  14. World Health Organization. Cervical cancer [Internet]. WHO Fact Sheet. [cited 2022 Nov 12]. Available from: <https://www.who.int/news-room/fact-sheets/detail/cervical-cancer>
  15. World Health Organization. Global strategy to accelerate the elimination of cervical cancer as a public health problem and its associated goals and targets for the period 2020 – 2030. *United Nations Gen Assem* [Internet]. 2020 [cited 2022 Nov 12];2(1):1–56. Available from: <https://www.who.int/publications/i/item/9789240014107>
  16. Kitchener HC, Castle PE, Cox JT. Chapter 7: Achievements and limitations of cervical cytology screening. *Vaccine*. 2006 Aug 21;24(SUPPL. 3):S63–70.
  17. Belinson J. Cervical cancer screening by simple visual inspection after acetic acid. *Obstet Gynecol*. 2001 Sep 1;98(3):441–4.
  18. Ajenifuja KO, Gage JC, Adepiti AC, Wentzensen N, Eklund C, Reilly M, et al. A Population-Based Study of Visual Inspection With Acetic Acid (VIA) for Cervical Screening in Rural Nigeria. *Int J Gynecol Cancer* [Internet]. 2013 Mar 1 [cited 2022 Nov 12];23(3):507–12. Available from: <https://ijgc.bmj.com/content/23/3/507>
  19. Catarino R, Schäfer S, Vassilakos P, Petignat P, Arbyn M. Accuracy of combinations of visual inspection using acetic acid or lugol iodine to detect cervical precancer: a meta-analysis. *BJOG An Int J Obstet Gynaecol* [Internet]. 2018 Apr 1 [cited 2022 Nov 13];125(5):545–53. Available from: <https://onlinelibrary.wiley.com/doi/full/10.1111/1471-0528.14783>
  20. Silkensen SL, Schiffman M, Sahasrabuddhe V, Flanigan JS. Is It Time to Move Beyond Visual Inspection With Acetic Acid for Cervical Cancer Screening? *Glob Heal Sci Pract* [Internet]. 2018 Jun 27 [cited 2022 Nov 12];6(2):242–6. Available from: <https://www.ghspjournal.org/content/6/2/242>
  21. Hu L, Bell D, Antani S, Xue Z, Yu K, Horning MP, et al. An Observational Study of Deep Learning and Automated Evaluation of Cervical Images for Cancer Screening. *JNCI J Natl Cancer Inst* [Internet]. 2019 Sep 1 [cited 2022 Nov 12];111(9):923–32. Available from: <https://academic.oup.com/jnci/article/111/9/923/5272614>
  22. Pal A, Xue Z, Befano B, Rodriguez AC, Long LR, Schiffman M, et al. Deep Metric Learning for Cervical Image Classification. *IEEE Access*. 2021;9:53266–75.
  23. Xue Z, Novetsky AP, Einstein MH, Marcus JZ, Befano B, Guo P, et al. A demonstration of automated visual evaluation of cervical images taken with a smartphone camera. *Int J Cancer* [Internet]. 2020 Nov 1 [cited 2022 Nov 13];147(9):2416–23. Available from: <https://onlinelibrary.wiley.com/doi/full/10.1002/ijc.33029>
  24. Shamsunder S, Mishra A. Diagnostic Accuracy of Artificial Intelligence Algorithm incorporated into MobileODT Enhanced Visual Assessment for triaging Screen Positive Women after Cervical Cancer Screening. 2022 [cited 2022 Nov 13]; Available from: <https://doi.org/10.21203/rs.3.rs-1964690/v2>
  25. Irvin J, Rajpurkar P, Ko M, Yu Y, Ciurea-Ilicus S, Chute C, et al. CheXpert: A Large Chest Radiograph Dataset with Uncertainty Labels and Expert Comparison. *Proc*

- AAAI Conf Artif Intell [Internet]. 2019 Jul 17 [cited 2022 Nov 13];33(01):590–7. Available from: <https://ojs.aaai.org/index.php/AAAI/article/view/3834>
26. Song H, Kim M, Park D, Shin Y, Lee JG. Learning From Noisy Labels With Deep Neural Networks: A Survey. *IEEE Trans Neural Networks Learn Syst*. 2022;
  27. Karimi D, Dou H, Warfield SK, Gholipour A. Deep learning with noisy labels: Exploring techniques and remedies in medical image analysis. *Med Image Anal*. 2020 Oct 1;65:101759.
  28. Brastianos PK, Taylor-Weiner A, Manley PE, Jones RT, Dias-Santagata D, Thorner AR, et al. Exome sequencing identifies BRAF mutations in papillary craniopharyngiomas. *Nat Genet* [Internet]. 2014 [cited 2022 May 5];46(2):161–5. Available from: <https://pubmed.ncbi.nlm.nih.gov/24413733/>
  29. Easton DF, Ford D, Bishop DT, Haites N, Milner B, Allan L, et al. Breast and ovarian cancer incidence in BRCA1-mutation carriers. Breast Cancer Linkage Consortium. *Am J Hum Genet* [Internet]. 1995 [cited 2022 Nov 13];56(1):265. Available from: </pmc/articles/PMC1801337/?report=abstract>
  30. Wooster R, Neuhausen SL, Mangion J, Quirk Y, Ford D, Collins N, et al. Localization of a Breast Cancer Susceptibility Gene, BRCA2, to Chromosome 13q12-13. *Science* (80- ) [Internet]. 1994 Sep 30 [cited 2022 Nov 13];265(5181):2088–90. Available from: <https://www.science.org/doi/10.1126/science.8091231>
  31. Wooster R, Bignell G, Lancaster J, Swift S, Seal S, Mangion J, et al. Identification of the breast cancer susceptibility gene BRCA2. *Nat* 1995 3786559 [Internet]. 1995 Dec 28 [cited 2022 Nov 13];378(6559):789–92. Available from: <https://www.nature.com/articles/378789a0>
  32. Schiffman M, Castle PE, Jeronimo J, Rodriguez AC, Wacholder S. Human papillomavirus and cervical cancer. *Lancet*. 2007 Sep 8;370(9590):890–907.
  33. Bosch FX, Manos MM, Muñoz N, Sherman M, Jansen AM, Peto J, et al. Prevalence of Human Papillomavirus in Cervical Cancer: a Worldwide Perspective. *JNCI J Natl Cancer Inst* [Internet]. 1995 Jun 7 [cited 2022 Nov 13];87(11):796–802. Available from: <https://academic.oup.com/jnci/article/87/11/796/1141620>
  34. Bosch FX, Burchell AN, Schiffman M, Giuliano AR, de Sanjose S, Bruni L, et al. Epidemiology and Natural History of Human Papillomavirus Infections and Type-Specific Implications in Cervical Neoplasia. *Vaccine*. 2008 Aug 19;26(SUPPL. 10):K1–16.
  35. Herrero R, Schiffman MH, Bratti C, Hildesheim A, Balmaceda I, Sherman ME, et al. Design and methods of a population-based natural history study of cervical neoplasia in a rural province of Costa Rica: the Guanacaste Project. *Rev Panam Salud Publica* [Internet]. 1997 [cited 2022 Nov 13];1(5):411–25. Available from: <https://pubmed.ncbi.nlm.nih.gov/9180057/>
  36. Lemay A, Hoebel K, Bridge CP, Befano B, De Sanjosé S, Egemen D, et al. Improving the repeatability of deep learning models with Monte Carlo dropout. 2022 Feb 15 [cited 2022 Nov 13]; Available from: <https://arxiv.org/abs/2202.07562v1>
  37. Ahmed SR, Lemay A, Hoebel K, Kalpathy-Cramer J. Focal loss improves repeatability of deep learning models. *Med Imaging with Deep Learn*. 2022;
  38. Schiffman M, Wentzensen N, Wacholder S, Kinney W, Gage JC, Castle PE. Human Papillomavirus Testing in the Prevention of Cervical Cancer. *JNCI J Natl Cancer Inst* [Internet]. 2011 Mar 2 [cited 2022 Nov 13];103(5):368–83. Available from:

- <https://academic.oup.com/jnci/article/103/5/368/905734>
39. Huang SC, Pareek A, Seyyedi S, Banerjee I, Lungren MP. Fusion of medical imaging and electronic health records using deep learning: a systematic review and implementation guidelines. *npj Digit Med* 2020 31 [Internet]. 2020 Oct 16 [cited 2022 May 5];3(1):1–9. Available from: <https://www.nature.com/articles/s41746-020-00341-z>
  40. Yala A, Lehman C, Schuster T, Portnoi T, Barzilay R. A deep learning mammography-based model for improved breast cancer risk prediction. *Radiology* [Internet]. 2019 May 7 [cited 2022 May 5];292(1):60–6. Available from: <https://pubs.rsna.org/doi/full/10.1148/radiol.2019182716>
  41. Redmon J, Divvala S, Girshick R, Farhadi A. You only look once: Unified, real-time object detection. *Proc IEEE Comput Soc Conf Comput Vis Pattern Recognit*. 2016 Dec 9;2016-December:779–88.
  42. He K, Zhang X, Ren S, Sun J. Deep Residual Learning for Image Recognition. *Proc IEEE Comput Soc Conf Comput Vis Pattern Recognit* [Internet]. 2015 Dec 10 [cited 2022 May 5];2016-December:770–8. Available from: <https://arxiv.org/abs/1512.03385v1>
  43. Zhang H, Wu C, Zhang Z, Zhu Y, Lin H, Zhang Z, et al. ResNeSt: Split-Attention Networks. *IEEE Comput Soc Conf Comput Vis Pattern Recognit Work* [Internet]. 2020 Apr 19 [cited 2022 Nov 13];2022-June:2735–45. Available from: <https://arxiv.org/abs/2004.08955v2>
  44. Huang G, Liu Z, Van Der Maaten L, Weinberger KQ. Densely Connected Convolutional Networks. *Proc - 30th IEEE Conf Comput Vis Pattern Recognition, CVPR 2017* [Internet]. 2016 Aug 25 [cited 2022 May 5];2017-January:2261–9. Available from: <https://arxiv.org/abs/1608.06993v5>
  45. Vin Koay H, Huang Chuah J, Chow CO. Shifted-Window Hierarchical Vision Transformer for Distracted Driver Detection. *TENSYMP 2021 - 2021 IEEE Reg 10 Symp*. 2021 Aug 23;
  46. Lin TY, Goyal P, Girshick R, He K, Dollar P. Focal Loss for Dense Object Detection. *IEEE Trans Pattern Anal Mach Intell* [Internet]. 2017 Aug 7 [cited 2022 May 5];42(2):318–27. Available from: <https://arxiv.org/abs/1708.02002v2>
  47. de la Torre J, Puig D, Valls A. Weighted kappa loss function for multi-class classification of ordinal data in deep learning. *Pattern Recognit Lett*. 2018 Apr 1;105:144–54.
  48. Cao W, Mirjalili V, Raschka S. Rank consistent ordinal regression for neural networks with application to age estimation. *Pattern Recognit Lett*. 2020 Dec 1;140:325–31.
  49. Srivastava N, Hinton G, Krizhevsky A, Sutskever I, Salakhutdinov R. Dropout: A Simple Way to Prevent Neural Networks from Overfitting. *J Mach Learn Res* [Internet]. 2014 [cited 2022 Nov 13];15(56):1929–58. Available from: <http://jmlr.org/papers/v15/srivastava14a.html>
  50. Gal Y, Ghahramani Z. Dropout as a Bayesian Approximation: Representing Model Uncertainty in Deep Learning. *33rd Int Conf Mach Learn ICML 2016* [Internet]. 2015 Jun 6 [cited 2022 May 5];3:1651–60. Available from: <https://arxiv.org/abs/1506.02142v6>
  51. Desai KT, Befano B, Xue Z, Kelly H, Campos NG, Egemen D, et al. The

- development of “automated visual evaluation” for cervical cancer screening: The promise and challenges in adapting deep-learning for clinical testing. *Int J Cancer* [Internet]. 2022 Mar 1 [cited 2022 Nov 13];150(5):741–52. Available from: <https://onlinelibrary.wiley.com/doi/full/10.1002/ijc.33879>
52. Schiffman M, Glass AG, Wentzensen N, Rush BB, Castle PE, Scott DR, et al. A Long-Term Prospective Study of Type-Specific Human Papillomavirus Infection and Risk of Cervical Neoplasia among 20,000 Women in the Portland Kaiser Cohort Study. *Cancer Epidemiol Biomarkers Prev* [Internet]. 2011 [cited 2022 Nov 13];20(7):1398. Available from: [/pmc/articles/PMC3156084/](https://pubmed.ncbi.nlm.nih.gov/2156084/)
  53. Gage JC, Schiffman M, Katki HA, Castle PE, Fetterman B, Wentzensen N, et al. Reassurance against future risk of precancer and cancer conferred by a negative human papillomavirus test. *J Natl Cancer Inst* [Internet]. 2014 Aug 1 [cited 2022 Nov 13];106(8). Available from: <https://pubmed.ncbi.nlm.nih.gov/25038467/>
  54. Demarco M, Hyun N, Carter-Pokras O, Raine-Bennett TR, Cheung L, Chen X, et al. A study of type-specific HPV natural history and implications for contemporary cervical cancer screening programs. *EClinicalMedicine*. 2020 May 1;22:100293.
  55. Rodriguez AC, Schiffman M, Herrero R, Hildesheim A, Bratti C, Sherman ME, et al. Longitudinal study of human papillomavirus persistence and cervical intraepithelial neoplasia grade 2/3: critical role of duration of infection. *J Natl Cancer Inst* [Internet]. 2010 Mar [cited 2022 Nov 13];102(5):315–24. Available from: <https://pubmed.ncbi.nlm.nih.gov/20157096/>
  56. ASCUS-LSIL Triage Study (ALTS) Group. A randomized trial on the management of low-grade squamous intraepithelial lesion cytology interpretations. *Am J Obstet Gynecol* [Internet]. 2003 Jun 1 [cited 2022 Nov 13];188(6):1393–400. Available from: <https://pubmed.ncbi.nlm.nih.gov/12824968/>
  57. Herrero R, Wacholder S, Rodríguez AC, Solomon D, González P, Kreimer AR, et al. Prevention of persistent human papillomavirus infection by an HPV16/18 vaccine: a community-based randomized clinical trial in Guanacaste, Costa Rica. *Cancer Discov* [Internet]. 2011 Oct [cited 2022 Nov 13];1(5):408–19. Available from: <https://pubmed.ncbi.nlm.nih.gov/22586631/>
  58. Wang SS, Zuna RE, Wentzensen N, Dunn ST, Sherman ME, Gold MA, et al. Human papillomavirus cofactors by disease progression and human papillomavirus types in the study to understand cervical cancer early endpoints and determinants. *Cancer Epidemiol Biomarkers Prev* [Internet]. 2009 Jan [cited 2022 Nov 13];18(1):113–20. Available from: <https://pubmed.ncbi.nlm.nih.gov/19124488/>
  59. Wentzensen N, Schwartz L, Zuna RE, Smith K, Mathews C, Gold MA, et al. Performance of p16/Ki-67 immunostaining to detect cervical cancer precursors in a colposcopy referral population. *Clin Cancer Res* [Internet]. 2012 Aug 1 [cited 2022 Nov 13];18(15):4154–62. Available from: <https://pubmed.ncbi.nlm.nih.gov/22675168/>
  60. Van Der Marel J, Berkhof J, Ordi J, Torné A, Del Pino M, Van Baars R, et al. Attributing oncogenic human papillomavirus genotypes to high-grade cervical neoplasia: which type causes the lesion? *Am J Surg Pathol* [Internet]. 2015 Apr 1 [cited 2022 Nov 13];39(4):496–504. Available from: <https://europepmc.org/article/med/25353286>

## 1 **SUPPLEMENTARY INFORMATION**

### 2 **SUPPLEMENT SECTION 1: SUPPLEMENTARY METHODS**

#### 3 **(A) INDIVIDUAL DATASET DESCRIPTIONS**

##### 4 5 **(i) Natural History Study (NHS)**

6 The Natural History Study (NHS) is a population-based prospective study carried out in  
7 Guanacaste Costa Rica between 1993 and 2000 (35). This cohort enrolled women  
8 followed in either an active cohort with visits every 6-12 months or a passive cohort  
9 screened once during follow-up between 5-7 years after enrollment. Screening visits  
10 included collection of specimens for cytology, human papillomavirus (HPV) testing, and  
11 digital images, while histology was collected among women with abnormal colposcopic  
12 evaluation. Cytology was assessed via both conventional and liquid-based methods as  
13 well as a first-generation automated approach. HPV testing by MY09/MY11 polymerase  
14 chain reaction (PCR) consensus primers was performed on samples collected by  
15 Dacron swabs, however, these results were not used for colposcopy referral during the  
16 study. Two cervical images per visit were collected at each screening visit using a  
17 Cervigram cerviscope, which were later digitized and compressed for storage (55).

18

##### 19 **(ii) ASCUS/LSIL Triage Study for Cervical Cancer (ALTS)**

20 The ASCUS/LSIL Triage Study for Cervical Cancer (ALTS) is a multi-center randomized  
21 trial of US women conducted between 1996 and 2000. This study enrolled women  
22 attending colposcopy clinics with referral cytology of either atypical squamous cells of  
23 undetermined significance (ASCUS) or low-grade squamous intraepithelial lesion  
24 (LSIL). Women were followed for 2 years with screening visits every 6 months.  
25 Screening visit specimen collection included two cervical specimens, one for liquid-  
26 based cytology and one for HPV testing, as well as cervical images. Referral to  
27 colposcopy and histologic sampling varied by study visit, including enrollment referral  
28 following the referral cytology result as well as the randomized HPV result, referral from  
29 follow-up visit due to high-grade squamous intraepithelial lesion (HSIL) cytology, and  
30 exit colposcopy for all women. Type-specific HPV results were not used for patient  
31 management (56). Cytologic diagnosis were based on ThinPrep slides created from

32 cytobrush collected exfoliated cells eluted into PreservCyt-media specimens, with both  
33 clinical and quality control (QC) evaluations performed. HPV typing was performed by  
34 PCR on specimens collected in PreservCyt. A cerviscope was used to collect two  
35 images per screening visit and were later converted to a digital format in the same  
36 process used for NHS images.

37

### 38 (iii) Costa Rica Vaccine Trial (CVT)

39 The CVT study is a double-blind, controlled, randomized, phase III study of the efficacy  
40 of an HPV16/18 virus-like particle (VLP) vaccine in the prevention of advanced cervical  
41 intraepithelial neoplasia (cervical intraepithelial neoplasia (CIN) 2, CIN3,  
42 adenocarcinoma in situ (AIS) and invasive cervical cancer) associated with HPV 16 or  
43 HPV 18 cervical infection in healthy young adult women in Costa Rica, Guanacaste,  
44 and parts of the Puntarenas provinces (57). Women were randomized to either the  
45 HPV16/18 or control group and followed up for 4 years as part of this study. Images  
46 were collected from women who were only referred for colposcopic evaluation, who  
47 remained at colposcopy until they had two consecutive results within normal limits.  
48 Images were acquired using a Nikon digital single-lens reflex (DSLR) camera with a  
49 beam splitter of colposcopy imaging and were subsequently collected using a boundary  
50 marking tool.

51

### 52 (iv) Biopsy study (Biop):

53 The Biopsy Study (Biop) was a population-based study of women referred to  
54 colposcopy for abnormal cervical cancer screening results conducted at the University  
55 of Oklahoma Health Sciences Center (OUHSC) from February 2009 to August 2011,  
56 designed with the goal of utilizing biopsies to improve detection of cervical precancer.  
57 HPV testing was conducted via the LINEAR ARRAY® multiplexed PCR-based assay.  
58 Histologic interpretation of biopsy and LEEP specimens was conducted using CIN  
59 terminologies. All women enrolled in the study had a colposcopy performed and at least  
60 one biopsy. Images were acquired using a Nikon DSLR camera with a beam splitter of  
61 colposcopy imaging and were subsequently annotated and collected using the  
62 boundary marking tool (59).

63 (v) Biopsy Study – Europe (D Biop)

64 Fifth, we used data and images from a European study (D Biop) designed to investigate  
65 high-risk HPV genotypes in women with histologic CIN2/3 referred on the basis of  
66 abnormal cytology. HPV typing was done on cytology and CIN2/3 biopsies. If the whole-  
67 tissue section of the biopsy was positive for multiple high-risk HPV types, LCM-PCR  
68 was performed. Images were acquired using a DSLR camera (60).

69

70

**SUPPLEMENT SECTION 2: SUPPLEMENTARY TABLES AND FIGURES**

| Histology              | Cytology      | HPV              | Study       |             |             |             |             |
|------------------------|---------------|------------------|-------------|-------------|-------------|-------------|-------------|
|                        |               |                  | NHS         | ALTS        | CVT         | Biop        | D Biop      |
| Cancer                 |               |                  | Cancer      | Cancer      | Cancer      | Cancer      | Cancer      |
| CIN3/AIS               |               |                  | Precancer   | Precancer   | Precancer   | Precancer   | Precancer   |
| CIN2                   |               | Onco+            | Precancer   | Precancer   | Precancer   | Precancer   | Precancer   |
|                        |               | Onco-            | Gray High   | Gray High   | Gray High   | Gray High   | Gray High   |
|                        |               | Missing          | Gray High   | Gray High   |             | Gray High   | Gray High   |
| CIN1                   |               | Onco+            | Gray Middle |             |             |             |             |
| Normal or no histology | Multiple HSIL | HPV16+           | Precancer   |             |             |             |             |
|                        |               | Onco+, not HPV16 | Gray High   |             |             |             |             |
|                        | HSIL          | Onco+            | Gray Middle | Gray High   | Gray High   | Gray High   | Gray High   |
|                        |               | Onco-            | Gray Low    | Gray Low    | Gray Low    | Gray Low    | Gray Low    |
|                        |               | Missing          | Gray Low    | Gray High   | Gray High   |             | Gray High   |
|                        | ASCUS/LSIL    | Onco+            | Gray Middle | Gray Middle | Gray Middle | Gray Middle | Gray Middle |
|                        | LSIL          | Onco-            | Gray Low    | Gray Low    | Gray Low    | Gray Low    | Gray Low    |
|                        | ASCUS         | Onco-            | Normal      | Normal      | Normal      | Normal      | Normal      |
| Missing                |               | Normal           | Gray Low    | Gray Low    |             | Gray Low    |             |
| NILM                   | Onco+         | Gray Low         | Gray Low    | Gray Low    | Gray Low    | Gray Low    |             |
|                        | Onco-         | Normal           | Normal      | Normal      | Normal      | Normal      |             |
|                        | Missing       |                  | Normal      | Normal      | Normal      | Normal      |             |
| Missing                | Onco+         |                  |             |             |             | Gray Low    |             |
|                        | Onco-         |                  |             |             |             | Normal      |             |

**Supplementary Table 1.** Detailed breakdown of ground truth definitions by study.



| Supplementary Table 2: Detailed breakdown of full 5-study dataset by set (train, validation, test 1 or test 2), study and ground truth |                                        |          |                                          |          |                                           |          |          |          |          |          |                                 |          |          |          |          |          |
|----------------------------------------------------------------------------------------------------------------------------------------|----------------------------------------|----------|------------------------------------------|----------|-------------------------------------------|----------|----------|----------|----------|----------|---------------------------------|----------|----------|----------|----------|----------|
| STUDY                                                                                                                                  | GROUND TRUTH CATEGORIES                |          |                                          |          |                                           |          |          |          |          |          | GRAND TOTAL BY STUDY            |          |          |          |          |          |
|                                                                                                                                        | no. (%)                                |          |                                          |          |                                           |          |          |          |          |          | (n=17013, n <sub>w</sub> =9462) |          |          |          |          |          |
|                                                                                                                                        | Normal (n=11630, n <sub>w</sub> =6092) |          | Gray Zone (n=3586, n <sub>w</sub> =2314) |          | Precancer+ (n=1797, n <sub>w</sub> =1056) |          | no. (%)  |          |          |          |                                 |          |          |          |          |          |
|                                                                                                                                        | # images                               | # women  | # images                                 | # women  | # images                                  | # women  | # images | # women  | # images | # women  |                                 |          |          |          |          |          |
| <b>Train Set</b>                                                                                                                       |                                        |          |                                          |          |                                           |          |          |          |          |          |                                 |          |          |          |          |          |
| NHS                                                                                                                                    | 5407                                   | (77.4%)  | 2711                                     | (74.2%)  | 330                                       | (15.3%)  | 165      | (11.9%)  | 206      | (19.0%)  | 104                             | (16.4%)  | 5943     | (58.1%)  | 2980     | (52.4%)  |
| ALTS                                                                                                                                   | 1129                                   | (16.2%)  | 566                                      | (15.5%)  | 853                                       | (39.6%)  | 430      | (30.9%)  | 434      | (40.1%)  | 218                             | (34.3%)  | 2416     | (23.6%)  | 1214     | (21.4%)  |
| CVT                                                                                                                                    | 253                                    | (3.6%)   | 253                                      | (6.9%)   | 336                                       | (15.6%)  | 335      | (24.1%)  | 121      | (11.2%)  | 119                             | (18.7%)  | 710      | (6.9%)   | 707      | (12.4%)  |
| Biop                                                                                                                                   | 93                                     | (1.3%)   | 40                                       | (1.1%)   | 192                                       | (8.9%)   | 88       | (6.3%)   | 164      | (15.2%)  | 79                              | (12.4%)  | 449      | (4.4%)   | 207      | (3.6%)   |
| D Biop                                                                                                                                 | 105                                    | (1.5%)   | 85                                       | (2.3%)   | 444                                       | (20.6%)  | 374      | (26.9%)  | 157      | (14.5%)  | 116                             | (18.2%)  | 706      | (6.9%)   | 575      | (10.1%)  |
| <b>TOTAL</b>                                                                                                                           | 6987                                   | (100.0%) | 3655                                     | (100.0%) | 2155                                      | (100.0%) | 1392     | (100.0%) | 1082     | (100.0%) | 636                             | (100.0%) | 10224    | (100.0%) | 5683     | (100.0%) |
| (a)                                                                                                                                    | 68.3%                                  |          | 64.3%                                    |          | 21.1%                                     |          | 24.5%    |          | 10.6%    |          | 11.2%                           |          | 100.0%   |          | 100.0%   |          |
| (b)                                                                                                                                    |                                        |          |                                          |          |                                           |          |          |          |          |          |                                 |          | 60.1%    |          | 60.1%    |          |
| <b>Validation Set</b>                                                                                                                  |                                        |          |                                          |          |                                           |          |          |          |          |          |                                 |          |          |          |          |          |
| NHS                                                                                                                                    | 903                                    | (77.6%)  | 452                                      | (73.6%)  | 55                                        | (15.1%)  | 28       | (12.3%)  | 34       | (19.2%)  | 17                              | (16.7%)  | 992      | (58.2%)  | 497      | (52.6%)  |
| ALTS                                                                                                                                   | 187                                    | (16.1%)  | 94                                       | (15.3%)  | 142                                       | (39.0%)  | 71       | (31.1%)  | 72       | (40.7%)  | 36                              | (35.3%)  | 401      | (23.5%)  | 201      | (21.3%)  |
| CVT                                                                                                                                    | 48                                     | (4.1%)   | 48                                       | (7.8%)   | 53                                        | (14.6%)  | 53       | (23.2%)  | 17       | (9.6%)   | 17                              | (16.7%)  | 118      | (6.9%)   | 118      | (12.5%)  |
| Biop                                                                                                                                   | 10                                     | (0.9%)   | 6                                        | (1.0%)   | 35                                        | (9.6%)   | 14       | (6.1%)   | 29       | (16.4%)  | 13                              | (12.7%)  | 74       | (4.3%)   | 33       | (3.5%)   |
| D Biop                                                                                                                                 | 15                                     | (1.3%)   | 14                                       | (2.3%)   | 79                                        | (21.7%)  | 62       | (27.2%)  | 25       | (14.1%)  | 19                              | (18.6%)  | 119      | (7.0%)   | 95       | (10.1%)  |
| <b>TOTAL</b>                                                                                                                           | 1163                                   | (100.0%) | 614                                      | (100.0%) | 364                                       | (100.0%) | 228      | (100.0%) | 177      | (100.0%) | 102                             | (100.0%) | 1704     | (100.0%) | 944      | (100.0%) |
| (a)                                                                                                                                    | 68.3%                                  |          | 65.0%                                    |          | 21.4%                                     |          | 24.2%    |          | 10.4%    |          | 10.8%                           |          | 100.0%   |          | 100.0%   |          |
| (b)                                                                                                                                    |                                        |          |                                          |          |                                           |          |          |          |          |          |                                 |          | 10.0%    |          | 10.0%    |          |
| <b>Test Set 1</b>                                                                                                                      |                                        |          |                                          |          |                                           |          |          |          |          |          |                                 |          |          |          |          |          |
| NHS                                                                                                                                    | 1798                                   | (77.3%)  | 903                                      | (74.1%)  | 108                                       | (15.3%)  | 55       | (11.9%)  | 70       | (19.1%)  | 35                              | (16.2%)  | 1976     | (58.1%)  | 993      | (52.3%)  |
| ALTS                                                                                                                                   | 376                                    | (16.2%)  | 189                                      | (15.5%)  | 285                                       | (40.3%)  | 143      | (31.0%)  | 146      | (39.8%)  | 73                              | (33.8%)  | 807      | (23.7%)  | 405      | (21.3%)  |
| CVT                                                                                                                                    | 86                                     | (3.7%)   | 86                                       | (7.1%)   | 110                                       | (15.6%)  | 110      | (23.8%)  | 42       | (11.4%)  | 42                              | (19.4%)  | 238      | (7.0%)   | 238      | (12.5%)  |
| Biop                                                                                                                                   | 30                                     | (1.3%)   | 13                                       | (1.1%)   | 60                                        | (8.5%)   | 29       | (6.3%)   | 55       | (15.0%)  | 27                              | (12.5%)  | 145      | (4.3%)   | 69       | (3.6%)   |
| D Biop                                                                                                                                 | 35                                     | (1.5%)   | 28                                       | (2.3%)   | 144                                       | (20.4%)  | 125      | (27.1%)  | 54       | (14.7%)  | 39                              | (18.1%)  | 233      | (6.9%)   | 192      | (10.1%)  |
| <b>TOTAL</b>                                                                                                                           | 2325                                   | (100.0%) | 1219                                     | (100.0%) | 707                                       | (100.0%) | 462      | (100.0%) | 367      | (100.0%) | 216                             | (100.0%) | 3399     | (100.0%) | 1897     | (100.0%) |
| (a)                                                                                                                                    | 68.4%                                  |          | 64.3%                                    |          | 20.8%                                     |          | 24.4%    |          | 10.8%    |          | 11.4%                           |          | 100.0%   |          | 100.0%   |          |
| (b)                                                                                                                                    |                                        |          |                                          |          |                                           |          |          |          |          |          |                                 |          | 20.0%    |          | 20.0%    |          |
| <b>Test Set 2</b>                                                                                                                      |                                        |          |                                          |          |                                           |          |          |          |          |          |                                 |          |          |          |          |          |
| NHS                                                                                                                                    | 902                                    | (78.1%)  | 452                                      | (74.8%)  | 54                                        | (15.0%)  | 27       | (11.6%)  | 34       | (19.9%)  | 17                              | (16.7%)  | 990      | (58.7%)  | 496      | (52.9%)  |
| ALTS                                                                                                                                   | 187                                    | (16.2%)  | 94                                       | (15.6%)  | 144                                       | (40.0%)  | 72       | (31.0%)  | 72       | (42.1%)  | 36                              | (35.3%)  | 403      | (23.9%)  | 202      | (21.5%)  |
| CVT                                                                                                                                    | 37                                     | (3.2%)   | 37                                       | (6.1%)   | 56                                        | (15.6%)  | 56       | (24.1%)  | 17       | (9.9%)   | 17                              | (16.7%)  | 110      | (6.5%)   | 110      | (11.7%)  |
| Biop                                                                                                                                   | 14                                     | (1.2%)   | 7                                        | (1.2%)   | 28                                        | (7.8%)   | 15       | (6.5%)   | 27       | (15.8%)  | 13                              | (12.7%)  | 69       | (4.1%)   | 35       | (3.7%)   |
| D Biop                                                                                                                                 | 15                                     | (1.3%)   | 14                                       | (2.3%)   | 78                                        | (21.7%)  | 62       | (26.7%)  | 21       | (12.3%)  | 19                              | (18.6%)  | 114      | (6.8%)   | 95       | (10.1%)  |
| <b>TOTAL</b>                                                                                                                           | 1155                                   | (100.0%) | 604                                      | (100.0%) | 360                                       | (100.0%) | 232      | (100.0%) | 171      | (100.0%) | 102                             | (100.0%) | 1686     | (100.0%) | 938      | (100.0%) |
| (a)                                                                                                                                    | 68.5%                                  |          | 64.4%                                    |          | 21.4%                                     |          | 24.7%    |          | 10.1%    |          | 10.9%                           |          | 100.0%   |          | 100.0%   |          |
| (b)                                                                                                                                    |                                        |          |                                          |          |                                           |          |          |          |          |          |                                 |          | 9.9%     |          | 9.9%     |          |
| <b>GRAND TOTAL BY GROUND TRUTH</b>                                                                                                     |                                        |          |                                          |          |                                           |          |          |          |          |          |                                 |          |          |          |          |          |
| no. (%)                                                                                                                                | 11630                                  |          | 6092                                     |          | 3586                                      |          | 2314     |          | 1797     |          | 1056                            |          | 17013    |          | 9462     |          |
|                                                                                                                                        | (68.4%)                                |          | (64.4%)                                  |          | (21.1%)                                   |          | (24.5%)  |          | (10.6%)  |          | (11.2%)                         |          | (100.0%) |          | (100.0%) |          |

**Supplementary Table 2:** Detailed breakdown of full 5-study dataset by set (train, validation, test 1, test 2), study and ground truth. n<sub>t</sub>=total # images; n<sub>w</sub>=total # women; (a) Ground truth ratios (by images or women) within each set (train/validation/test 1/test 2) = Total # (images or women) in the ground truth category of set ÷ Total # (images or women) in the set; (b) Proportion of total (images or women) in each set (train/validation/test 1/test 2) = Total # (images or women) in the set ÷ Total # (images or women) in the full dataset.

| Supplementary Table 3: Detailed breakdown of rebalanced dataset after applying "remove controls" balancing, by set ( train, validation, test 1 or test 2), study and ground truth |                          |          |                            |          |                             |          |                 |          |                 |          |                      |          |                   |          |                  |          |
|-----------------------------------------------------------------------------------------------------------------------------------------------------------------------------------|--------------------------|----------|----------------------------|----------|-----------------------------|----------|-----------------|----------|-----------------|----------|----------------------|----------|-------------------|----------|------------------|----------|
| STUDY                                                                                                                                                                             | Ground truth categories  |          |                            |          |                             |          |                 |          |                 |          | GRAND TOTAL BY STUDY |          |                   |          |                  |          |
|                                                                                                                                                                                   | no. (%)                  |          |                            |          |                             |          |                 |          |                 |          | no. (%)              |          |                   |          |                  |          |
|                                                                                                                                                                                   | Normal (n=11630, n=6092) |          | Gray Zone (n=3586, n=2314) |          | Precancer+ (n=1797, n=1056) |          |                 |          |                 |          |                      |          |                   |          |                  |          |
|                                                                                                                                                                                   | # images                 | # women  | # images                   | # women  | # images                    | # women  | # images        | # women  | # images        | # women  | # images             | # women  |                   |          |                  |          |
| <b>Train Set</b>                                                                                                                                                                  |                          |          |                            |          |                             |          |                 |          |                 |          |                      |          |                   |          |                  |          |
| NHS                                                                                                                                                                               | 1887                     | (77.6%)  | 946                        | (74.4%)  | 330                         | (15.3%)  | 165             | (11.9%)  | 206             | (19.0%)  | 104                  | (16.4%)  | 2423              | (42.7%)  | 1215             | (36.8%)  |
| ALTS                                                                                                                                                                              | 387                      | (15.9%)  | 194                        | (15.3%)  | 853                         | (39.6%)  | 430             | (30.9%)  | 434             | (40.1%)  | 218                  | (34.3%)  | 1674              | (29.5%)  | 842              | (25.5%)  |
| CVT                                                                                                                                                                               | 88                       | (3.6%)   | 88                         | (6.9%)   | 336                         | (15.6%)  | 335             | (24.1%)  | 121             | (11.2%)  | 119                  | (18.7%)  | 545               | (9.6%)   | 542              | (16.4%)  |
| Biop                                                                                                                                                                              | 35                       | (1.4%)   | 13                         | (1.0%)   | 192                         | (8.9%)   | 88              | (6.3%)   | 164             | (15.2%)  | 79                   | (12.4%)  | 391               | (6.9%)   | 180              | (5.5%)   |
| D Biop                                                                                                                                                                            | 35                       | (1.4%)   | 31                         | (2.4%)   | 444                         | (20.6%)  | 374             | (26.9%)  | 157             | (14.5%)  | 116                  | (18.2%)  | 636               | (11.2%)  | 521              | (15.8%)  |
| <b>TOTAL</b>                                                                                                                                                                      | 2432                     | (100.0%) | 1272                       | (100.0%) | 2155                        | (100.0%) | 1392            | (100.0%) | 1082            | (100.0%) | 636                  | (100.0%) | 5669              | (100.0%) | 3300             | (100.0%) |
| (a)                                                                                                                                                                               | 42.9%                    |          | 38.5%                      |          | 38.0%                       |          | 42.2%           |          | 19.1%           |          | 19.3%                |          | 100.0%            |          | 100.0%           |          |
| (b)                                                                                                                                                                               |                          |          |                            |          |                             |          |                 |          |                 |          |                      |          | 33.3%             |          | 34.9%            |          |
| <b>Validation Set</b>                                                                                                                                                             |                          |          |                            |          |                             |          |                 |          |                 |          |                      |          |                   |          |                  |          |
| NHS                                                                                                                                                                               | 291                      | (76.0%)  | 146                        | (71.6%)  | 55                          | (15.1%)  | 28              | (12.3%)  | 34              | (19.2%)  | 17                   | (16.7%)  | 380               | (41.1%)  | 191              | (35.8%)  |
| ALTS                                                                                                                                                                              | 65                       | (17.0%)  | 33                         | (16.2%)  | 142                         | (39.0%)  | 71              | (31.1%)  | 72              | (40.7%)  | 36                   | (35.3%)  | 279               | (30.2%)  | 140              | (26.2%)  |
| CVT                                                                                                                                                                               | 19                       | (5.0%)   | 19                         | (9.3%)   | 53                          | (14.6%)  | 53              | (23.2%)  | 17              | (9.6%)   | 17                   | (16.7%)  | 89                | (9.6%)   | 89               | (16.7%)  |
| Biop                                                                                                                                                                              | 4                        | (1.0%)   | 2                          | (1.0%)   | 35                          | (9.6%)   | 14              | (6.1%)   | 29              | (16.4%)  | 13                   | (12.7%)  | 68                | (7.4%)   | 29               | (5.4%)   |
| D Biop                                                                                                                                                                            | 4                        | (1.0%)   | 4                          | (2.0%)   | 79                          | (21.7%)  | 62              | (27.2%)  | 25              | (14.1%)  | 19                   | (18.6%)  | 108               | (11.7%)  | 85               | (15.9%)  |
| <b>TOTAL</b>                                                                                                                                                                      | 383                      | (100.0%) | 204                        | (100.0%) | 364                         | (100.0%) | 228             | (100.0%) | 177             | (100.0%) | 102                  | (100.0%) | 924               | (100.0%) | 534              | (100.0%) |
| (a)                                                                                                                                                                               | 41.5%                    |          | 38.2%                      |          | 39.4%                       |          | 42.7%           |          | 19.2%           |          | 19.1%                |          | 100.0%            |          | 100.0%           |          |
| (b)                                                                                                                                                                               |                          |          |                            |          |                             |          |                 |          |                 |          |                      |          | 5.4%              |          | 5.6%             |          |
| <b>Test Set 1</b>                                                                                                                                                                 |                          |          |                            |          |                             |          |                 |          |                 |          |                      |          |                   |          |                  |          |
| NHS                                                                                                                                                                               | 5930                     | (77.4%)  | 2974                       | (74.1%)  | 108                         | (15.3%)  | 55              | (11.9%)  | 70              | (19.1%)  | 35                   | (16.2%)  | 6108              | (69.9%)  | 3064             | (65.3%)  |
| ALTS                                                                                                                                                                              | 1240                     | (16.2%)  | 622                        | (15.5%)  | 285                         | (40.3%)  | 143             | (31.0%)  | 146             | (39.8%)  | 73                   | (33.8%)  | 1671              | (19.1%)  | 838              | (17.9%)  |
| CVT                                                                                                                                                                               | 280                      | (3.7%)   | 280                        | (7.0%)   | 110                         | (15.6%)  | 110             | (23.8%)  | 42              | (11.4%)  | 42                   | (19.4%)  | 432               | (4.9%)   | 432              | (9.2%)   |
| Biop                                                                                                                                                                              | 94                       | (1.2%)   | 44                         | (1.1%)   | 60                          | (8.5%)   | 29              | (6.3%)   | 55              | (15.0%)  | 27                   | (12.5%)  | 209               | (2.4%)   | 100              | (2.1%)   |
| D Biop                                                                                                                                                                            | 116                      | (1.5%)   | 92                         | (2.3%)   | 144                         | (20.4%)  | 125             | (27.1%)  | 54              | (14.7%)  | 39                   | (18.1%)  | 314               | (3.6%)   | 256              | (5.5%)   |
| <b>TOTAL</b>                                                                                                                                                                      | 7660                     | (100.0%) | 4012                       | (100.0%) | 707                         | (100.0%) | 462             | (100.0%) | 367             | (100.0%) | 216                  | (100.0%) | 8734              | (100.0%) | 4690             | (100.0%) |
| (a)                                                                                                                                                                               | 87.7%                    |          | 85.5%                      |          | 8.1%                        |          | 9.9%            |          | 4.2%            |          | 4.6%                 |          | 100.0%            |          | 100.0%           |          |
| (b)                                                                                                                                                                               |                          |          |                            |          |                             |          |                 |          |                 |          |                      |          | 51.3%             |          | 49.6%            |          |
| <b>Test Set 2</b>                                                                                                                                                                 |                          |          |                            |          |                             |          |                 |          |                 |          |                      |          |                   |          |                  |          |
| NHS                                                                                                                                                                               | 902                      | (78.1%)  | 452                        | (74.8%)  | 54                          | (15.0%)  | 27              | (11.6%)  | 34              | (19.9%)  | 17                   | (16.7%)  | 990               | (58.7%)  | 496              | (52.9%)  |
| ALTS                                                                                                                                                                              | 187                      | (16.2%)  | 94                         | (15.6%)  | 144                         | (40.0%)  | 72              | (31.0%)  | 72              | (42.1%)  | 36                   | (35.3%)  | 403               | (23.9%)  | 202              | (21.5%)  |
| CVT                                                                                                                                                                               | 37                       | (3.2%)   | 37                         | (6.1%)   | 56                          | (15.6%)  | 56              | (24.1%)  | 17              | (9.9%)   | 17                   | (16.7%)  | 110               | (6.5%)   | 110              | (11.7%)  |
| Biop                                                                                                                                                                              | 14                       | (1.2%)   | 7                          | (1.2%)   | 28                          | (7.8%)   | 15              | (6.5%)   | 27              | (15.8%)  | 13                   | (12.7%)  | 69                | (4.1%)   | 35               | (3.7%)   |
| D Biop                                                                                                                                                                            | 15                       | (1.3%)   | 14                         | (2.3%)   | 78                          | (21.7%)  | 62              | (26.7%)  | 21              | (12.3%)  | 19                   | (18.6%)  | 114               | (6.8%)   | 95               | (10.1%)  |
| <b>TOTAL</b>                                                                                                                                                                      | 1155                     | (100.0%) | 604                        | (100.0%) | 360                         | (100.0%) | 232             | (100.0%) | 171             | (100.0%) | 102                  | (100.0%) | 1686              | (100.0%) | 938              | (100.0%) |
| (a)                                                                                                                                                                               | 68.5%                    |          | 64.4%                      |          | 21.4%                       |          | 24.7%           |          | 10.1%           |          | 10.9%                |          | 100.0%            |          | 100.0%           |          |
| (b)                                                                                                                                                                               |                          |          |                            |          |                             |          |                 |          |                 |          |                      |          | 9.9%              |          | 9.9%             |          |
| <b>GRAND TOTAL BY GROUND TRUTH</b>                                                                                                                                                |                          |          |                            |          |                             |          |                 |          |                 |          |                      |          |                   |          |                  |          |
| no. (%)                                                                                                                                                                           | 11630<br>(68.4%)         |          | 6092<br>(64.4%)            |          | 3586<br>(21.1%)             |          | 2314<br>(24.5%) |          | 1797<br>(10.6%) |          | 1056<br>(11.2%)      |          | 17013<br>(100.0%) |          | 9462<br>(100.0%) |          |

**Supplementary Table 3:** Detailed breakdown of rebalanced dataset after "remove controls" balancing by set (train, validation, test 1, test 2), study and ground truth. n=total # images; n=total # women; (a) Ground truth ratios (by images or women) within each set (train/validation/test 1/test 2) = Total # (images or women) in the ground truth category of set ÷ Total # (images or women) in the set; (b) Proportion of total (images or women) in each set (train/validation/test 1/test 2) = Total # (images or women) in the set ÷ Total # (images or women) in the full dataset.
